1 ***Strongyloides stercoralis*: spatial distribution of a highly prevalent**  
2 **and ubiquitous soil-transmitted helminth in Cambodia**

3

4 Armelle Forrer<sup>1,2</sup>, Virak Khieu<sup>3</sup>, Penelope Vounatsou<sup>1,2</sup>, Paiboon Sithithaworn<sup>4</sup>, Sirowan  
5 Ruantip<sup>5</sup>, Rekol Huy<sup>3</sup>, Sinuon Muth<sup>3</sup>, Peter Odermatt<sup>1,2\*</sup>

6 **1** Swiss Tropical and Public Health Institute, Basel, Switzerland; **2** University of Basel, Basel,  
7 Switzerland; **3** National Centre for Parasitology, Entomology and Malaria Control, Ministry  
8 of Health, Phnom Penh, Cambodia; **4** Department of Parasitology and Cholangiocarcinoma  
9 Research Institute, Faculty of Medicine, Khon Kaen University, Khon Kaen, Thailand **5**  
10 Graduated School of Biomedical Science, Khon Kaen University, Khon Kaen, Thailand;

11

12 \* corresponding author: [peter.odermatt@swisstph.ch](mailto:peter.odermatt@swisstph.ch)

## 13 **Abstract**

### 14 **Background**

15 *Strongyloides stercoralis* is a neglected soil-transmitted helminth that occurs worldwide and  
16 can cause long-lasting and potentially fatal infections due to its ability to replicate within its  
17 host. *S. stercoralis* causes gastrointestinal and dermatological morbidity. The objective of this  
18 study was to assess the *S. stercoralis* infection risk, and using geostatistical models, to predict  
19 its geographical distribution in Cambodia.

### 20 **Methodology / Principal Findings**

21 A nation-wide community-based parasitological survey was conducted among the population  
22 aged 6 years and above. *S. stercoralis* was diagnosed using a serological diagnostic test  
23 detecting antigens in urine. Data on demography, hygiene and knowledge about helminth  
24 infection were collected. *S. stercoralis* prevalence among 7,246 participants with complete  
25 data record was 30.5% and ranged across provinces between 10.9% and 48.2%. The parasite  
26 was ubiquitous in Cambodia, with prevalence rates below 20% only in five south-eastern  
27 provinces. Infection risk increased with age both in men and women although girls aged less  
28 than 13 years and women aged 50 years and above had lower odds of infection than their male  
29 counterparts. Open defecation was associated with higher odds of infection while declaring  
30 having some knowledge about health problems caused by worms was protective. Infection  
31 risk was positively associated with night maximum temperature, minimum rainfall, and  
32 distance to water, and negatively associated with land occupied by rice fields.

### 33 **Conclusions / Significance**

34 *S. stercoralis* infection is ubiquitous and rampant in Cambodia. The parasite needs to be  
35 addressed by control programs delivering ivermectin. However the high cost of this drug in  
36 Cambodia currently precludes control implementation. Donations, subsidization or the

37 production of affordable generic production are needed so *S. stercoralis*, which infests almost  
38 a third of the Cambodian population, can be addressed by an adequate control program.

39

40

#### 41 **Authors Summary**

42 The threadworm, *Strongyloides stercoralis*, is a most neglected worm infection transmitted  
43 through infective larvae on the soil. Threadworms occur worldwide and particularly in  
44 tropical climates. It may cause long-lasting and potentially fatal infections due to its ability to  
45 replicate within its host. This study aimed to assess the risk of threadworm infection in at the  
46 national level in Cambodia.

47 We conducted a nation-wide community-based parasitological survey among the population  
48 aged 6 years and above. The threadworm was diagnosed using a serological diagnostic test  
49 detecting antigens in urine. Data on demography, hygiene and knowledge about helminth  
50 infection were collected. The threadworm infection risk was calculated by using geostatistical  
51 models to predict its geographical distribution in Cambodia. About one third (30.5%) of the  
52 enrolled study participants (n=7,246) were infected with threadworms. The lowest and  
53 highest infection rates a province level was 10.9% and 48.2%, respectively. Prevalence rates  
54 below 20% were found only in five south-eastern provinces. The risk of an infection with  
55 threadworms increased with age in men and women. Open defecation was associated with  
56 higher risk of infection while declaring having some knowledge about health problems caused  
57 by worms was protective. Furthermore, the threadworm infection risk was positively  
58 associated with environmental factors such as night maximum temperature, minimum rainfall,  
59 and distance to water, and negatively associated with land occupied by rice fields.

60 Threadworm infection is highly prevalent in Cambodia and adequate control measures are  
61 warranted, including access to treatment, in order to address the burden of this NTD in  
62 Cambodia.

## 63 **Introduction**

64 *Strongyloides stercoralis* is a highly neglected intestinal nematode which larvae living  
65 in fecally polluted soil infect humans transcutaneously, like hookworms. *S. stercoralis* occurs  
66 worldwide but thrives in warm regions with poor sanitation conditions [1]. *S. stercoralis* has  
67 been under-detected and overlooked for decades because its larvae are not detected by  
68 standard field diagnostic techniques [1-5]. Up to recently, the only available estimates  
69 originated from a review conducted in the late 80s estimating that there would be 30-100  
70 million cases worldwide [6]. More recent estimates include prevalence rates between 10% and  
71 40% in subtropical and tropical countries, while, based on the ratio of hookworm vs. *S.*  
72 *stercoralis* cases in studies using diagnosis approaches adequate for the latter, *S. stercoralis*  
73 prevalence could be half of hookworm's, i.e. 200-370 cases worldwide [1, 7, 8].

74 In Cambodia, *S. stercoralis* was found to be highly prevalent in two community-based  
75 large-scale surveys documenting prevalence rates of 25% and 45% in the southern province of  
76 Takeo and the northern province of Preah Vihear, respectively [9, 10]. *S. stercoralis* infection  
77 is more prevalent among adults due to its unique ability among STH to replicate within the  
78 host, which leads to infections that can last for decades in absence of treatment [11].  
79 Importantly, in case of immunosuppression, this auto-infection cycle accelerates and results in  
80 hyperinfection, a condition that is 100% fatal if untreated [12-14]. Additionally, chronic  
81 infection with *S. stercoralis* may cause abdominal pain, nausea, vomiting, diarrhea, as well as  
82 urticaria and larva currens [15-17]. The latter is a serpiginous intermittent moving eruption  
83 due to the parasite migration under the skin. Its location on the buttocks, thighs and trunk,  
84 together with the high speed of migration, i.e. 5 to 10 centimeters an hour, makes it a highly  
85 specific symptom of strongyloidiasis [11, 13]. Finally, and although this aspect of infection  
86 needs to be confirmed, *S. stercoralis* infection might be associated with growth retardation in  
87 children [17]. Due to this combination of significant morbidity and high prevalence, *S.*

88 *stercoralis* has been recognized as a public health problem in Cambodia. However, the  
89 national prevalence and the location of high risk zones are unknown.

90 A highly sensitive diagnostic approach consists in combining the Baermann and Koga  
91 agar plate culture techniques but this method is costly, time and labor consuming and requires  
92 laboratory staff specifically trained to identify *S. stercoralis* larvae by microscopy.  
93 Serological diagnosis is more sensitive than most coprological approaches but its use may be  
94 limited in endemic settings due to cross-reaction with other helminths species [18, 19].  
95 Another issue is that serology may overestimate prevalence in endemic areas as it detects  
96 parasite-specific antibodies or antigens that can still be present long after contact with the  
97 parasite or cure, and cannot distinguish current from past infections [18]. While this last  
98 aspect would be an issue for cure assessment, it would not affect prevalence estimates in a  
99 population naïve to treatment against the investigated parasite. A serological test using an  
100 antigen from *S. ratti* to detect antibodies in urine was recently developed in Thailand [20, 21].  
101 This technique has several strengths. While collecting urine samples is much easier than fecal  
102 samples, this test has a high sensitivity for *S. stercoralis* detection and does not cross-react  
103 with other soil-transmitted helminth (STH) species [20, 21].

104 Geostatistical models have been increasingly used in the past decade to delineate risk  
105 zones for helminthic infections at small and large scale and help targeting control efforts in  
106 areas of highest need [22-29]. Based on the association between environmental variables and  
107 infection levels at survey locations, such models can be used to predict infection levels  
108 through entire geographical zones.

109 The aim of this work was to estimate *S. stercoralis* prevalence in Cambodia and to  
110 predict *S. stercoralis* infection risk throughout the country to help guiding control efforts. A  
111 national parasitological survey was conducted in 2016 in all provinces of Cambodia to assess  
112 the infection with *S. stercoralis* based on a serological diagnosis using antigens of *S. ratti*

113 [20]. Subsequently, geostatistical modeling was used to predict infection risk throughout the  
114 country.

## 115 **Methods**

### 116 **Ethics statement**

117 The study was approved by the National Ethics Committee for Health Research,  
118 Ministry of Health, Cambodia (NECHR, reference number 188, dated 02.05.2016). Prior to  
119 enrolment, all participants were explained the study goals and procedures. All participants  
120 aged 16 years and above provided written informed consent and parents or legal guardians  
121 provided consent for participants aged 6–15 years. All *S. stercoralis* cases were treated with a  
122 single oral dose of ivermectin (200µg/kg BW) and all other diagnosed parasitic infections  
123 were treated according to the national guidelines [30].

### 124 **Study setting**

125 Cambodia counted 15.6 million inhabitants in 2015, 79.3% of whom lived in rural  
126 areas. [31]. The country has been undergoing fast economic development in the past decades,  
127 and with a Human Development Index rank of 143/188 in 2016 Cambodia belonged to the  
128 group of lower middle-income country in the World Bank classification [31, 32]. Although  
129 poverty strongly decreased in the past years and the proportion if the population living in  
130 extreme poverty was down to 2.2% in 2016, about one person in 5 (21.6%) still lived with  
131 less than 3.1 US\$/day in 2016 [31]. Adult literacy and primary school net enrolment were  
132 74% and 95%, respectively, in the years 2010-2014 and 32% of children aged below 59  
133 months were stunted in 2015 [32]. Regarding water and sanitation in 2015, 42% and 69% of  
134 the rural population had access to improved sanitation facilities and improved water,

135 respectively, while those figures were 88% and 100% for the urban population, respectively  
136 [32].

### 137 **Study population and design**

138 A cross-sectional community-based survey was conducted among the general  
139 population in all 25 provinces of Cambodia between May and August 2016. In each province,  
140 10 villages were randomly selected. Overall, eighteen villages originally selected were  
141 replaced because their remoteness compromised the quality of collected samples for  
142 parasitological data. In each village, households were selected using a systemic proportional  
143 sampling and all household members present on the survey day were enrolled until a  
144 maximum of 35 participants per village was reached. All household members aged 6 years  
145 and above were eligible. All *S. stercoralis* cases were treated with a single oral dose of  
146 ivermectin (200µg/kg BW) and all other diagnosed parasitic infections were treated according  
147 to the national guidelines [30].

### 148 **Assessment of *Strongyloides stercoralis* infection**

149 Participants were asked to provide a urine sample on which *S. stercoralis* was  
150 diagnosed using an enzyme-linked immunosorbent assay (ELISA) based on *S. ratti* antigens  
151 [20]. After collection, urine specimens were preserved in NaN<sub>3</sub> with the final concentration of  
152 0.1% and kept at 4 °C until required for analysis. Samples were sent to the central  
153 laboratory of the National Centre for Parasitology, Entomology and Malaria Control (CNM)  
154 in Phnom Penh and from then sent to Khon Kaen University, Thailand, to proceed to the  
155 ELISA test. This method has shown to have no cross-reactivity with other STH, and has a  
156 high sensitivity, of 92.7%. *S. ratti* antigens may cross-react with filarial parasites, which are  
157 merely absent now from Cambodia, as well as with the liver fluke *Opisthorchis viverrini*,  
158 although very weakly [21, 33].

## 159 **Individual risk factor data**

160 An individual questionnaire including demographics (age, sex, education attainment,  
161 main occupation), the number of household members, as well as access to sanitation (latrine  
162 availability at home, usual defecation place) and knowledge on worm infections (transmission  
163 route of and health problems caused by helminths) was administered to all study participants.

## 164 **Environmental data**

165 Environmental parameters were extracted from freely available remote sensing (RS)  
166 sources for the period September 2015-August 2016, which corresponds to 1 year back from  
167 the last month of the study. Day and night land surface temperature (LST), international  
168 geosphere biosphere programme (IGBP) type 1 land use/land cover (LULC) as well as  
169 normalized difference vegetation index (NDVI) and enhanced vegetation index (EVI) were  
170 extracted at 1 x 1 km resolution from Moderate Resolution Imaging Spectroradiometer  
171 (MODIS) Land Processes Distributed Active Archive Center (LP DAAC), U.S. Geological  
172 Survey (USGS) Earth Resources Observation and Science (EROS) Center  
173 (<http://lpdaac.usgs.gov>). Rainfall data was obtained from WorldClim ([www.worldclim.org](http://www.worldclim.org)).  
174 Digital elevation data were retrieved from the NASA Shuttle Radar Topographic Mission  
175 (SRTM) and CGIAR-CSI database, whereas distance to large water bodies was obtained from  
176 Health Mapper.

## 177 **Data management**

178 Laboratory and questionnaire data were double-entered and validated in EpiData  
179 version 3.1 (EpiData Association; Odense, Denmark). Environmental data processing, geo-  
180 referencing and maps were done in ArcGIS version 10.2.1 (ESRI; Redlands, CA, United  
181 States). LULC 18 classes were merged into four categories according to similarity and  
182 respective frequencies. Year and seasonal means, maxima and minima of monthly means of



183 EVI, LST and RFE were calculated and standardized. Environmental data were linked to  
184 parasitological and questionnaire data according to geo-referenced location. Data  
185 management and non-Bayesian data analysis were done in STATA version 13.0 (StataCorp  
186 LP; College Station, United States of America). Bayesian geostatistical models were fitted  
187 using WinBUGS version 1.4.3 (Imperial College & Medical Research Council; London, UK).  
188 Age was grouped in five classes, as follows: (i) 6-12 years, (ii) 13-18 years, (iii) 19-30 years,  
189 (iv) 31-50 years, and (v) >50 years. Predictions at un-surveyed locations were performed in  
190 Fortran 95 (Compaq Visual Fortran Professional version 6.6.0, Compaq Computer  
191 Corporation; Houston, United States of America).

## 192 **Statistical Analysis**

193 Chi-square ( $\chi^2$ ) test was used to compare proportions. The association between infection  
194 risk and covariates was assessed, using mixed non spatial bivariate logistic regressions  
195 accounting for village clustering, i.e. with a non-spatial village-level random effect.  
196 Covariates exhibiting an association at a significance level of at least 15%, as determined by  
197 the likelihood ratio test (LRT), were included in the multivariate logistic regression models. In  
198 case of correlated variables, the variable resulting in the model with the smallest Akaike's  
199 information criterion (AIC) was selected. For the risk factor analysis, variables exhibiting  
200 high Wald p-values were removed one by one and kept outside the model if their removal  
201 resulted in a lower AIC. Summary measures of continuous environmental variables, i.e. LST  
202 day and night, rainfall and distance to water were standardized before inclusion in the  
203 multiple regression models. To explore the relationship between *S. stercoralis* infection risk  
204 and age, smoothed age-prevalence curves were produced with the "mkspline" command in  
205 STATA that regresses each outcome against a new age variable containing a restricted cubic  
206 spline of age.

207 For geostatistical models, a stationary isotropic process was assumed, with village-  
208 specific random effects following a normal distribution with mean zero and a variance-  
209 covariance matrix being an exponential function of the distance between pairs of locations.  
210 Vague prior distributions were chosen for all parameters. Further information on model  
211 specification is available in S1 Appendix. Markov chain Monte Carlo (MCMC) simulation  
212 was used to estimate model parameters [34]. Geostatistical models were run using the  
213 WinBUGS “spatial.unipred” function [35]. Convergence was assessed by examining the  
214 ergodic averages of selected parameters. For all models, a burn-in of 5,000 was followed by  
215 30,000 iterations, after which convergence was reached. Results were withdrawn for the last  
216 10,000 iterations of each chain, with a thinning of 10. Model fit was appraised with the  
217 Deviance Information Criterion (DIC). A lower DIC indicates a better model [36].

218 Three types of Bayesian mixed logistic models were run. First, models without covariates  
219 using alternately a geostatistical or an exchangeable random effect were run to quantify the  
220 extent of village-level spatial correlation and unexplained variance of *S. stercoralis*  
221 prevalence. Second, a risk factor analysis model was used to assess individual-level  
222 demographic, sanitation, and knowledge risk factors, as well as environmental covariates  
223 associated with infection risk. Third, a model including only environmental covariates was  
224 aimed at predicting infection risk at non-surveyed locations.

### 225 **Prediction of *S. stercoralis* at non-surveyed locations**

226 For model validation, 199 (80%) randomly selected villages were used for fitting and  
227 the 50 (20%) remaining were used as test locations. A pair of models containing the same  
228 covariates but including alternately a non-spatial (exchangeable) or spatial (geostatistical)  
229 random effect was run. Model predictive ability was assessed by comparing the Mean

230 Squared Error (MSE), which is obtained by squaring the average of absolute differences  
231 between predicted and observed prevalence rates at test locations.

232 Using the model with the best predictive ability, *S. stercoralis* infection risk was  
233 predicted at 68,410 pixels of 2x2 km resolution using Bayesian Kriging [37].

## 234 **Results**

### 235 **Study population**

236 Among the 8,661 participants enrolled in the study, 1407 did not provide any urine  
237 and 338 were discarded because they did not provide stool sample –which was requested for  
238 other assessments not presented in this work–, 8 participants did not have any questionnaire  
239 data. Overall 7,246 participants living in 2,585 households and 249 villages were included in  
240 the analysis. The mean number of participants per village was 30.2 with an interquartile range  
241 of 6, and a minimum of 5. Except the villages Ou Tracheak Chet in Preah Sihanouk Province  
242 (5 participants) and Kampong Chrey in Preah Vihear province (9 participants), all villages  
243 had more than 10 participants and 93.6% of villages had 20 participants or more. Table 1  
244 shows the characteristics of participants with complete parasitological and questionnaire data.

245 **Table 1:** Characteristics of the 7,246 participants included in the analysis

| Variable               | Category                 | N (%)        |
|------------------------|--------------------------|--------------|
| Sex                    | Male                     | 3,081 (42.5) |
|                        | Female                   | 4,165 (57.5) |
| Age (years)            | 6-12                     | 1,747 (24.1) |
|                        | 13-18                    | 954 (13.2)   |
|                        | 19-30                    | 1,142 (15.8) |
|                        | 31-50                    | 1,850 (25.5) |
|                        | >50                      | 1,553 (21.4) |
| Usual defecation place | Toilet                   | 4,961 (68.5) |
|                        | Forest                   | 1,768 (24.4) |
|                        | River, rice field, other | 517 (7.1)    |
| Education attainment   | Primary school           | 4,183 (57.7) |
|                        | No school                | 1,279 (17.7) |

| Variable                                        | Category             | N (%)        |
|-------------------------------------------------|----------------------|--------------|
| Main occupation                                 | Secondary            | 1,283 (17.7) |
|                                                 | High school and over | 501 (6.9)    |
|                                                 | Farmer               | 3,879 (53.5) |
|                                                 | At school            | 2,488 (34.4) |
|                                                 | At home              | 343 (4.7)    |
| Any knowledge about worms                       | Other                | 536 (7.4)    |
|                                                 | No                   | 3,103 (42.8) |
| Knowledge about source of infection with worms  | Yes                  | 4,143 (57.2) |
|                                                 | No                   | 3,995 (55.1) |
| Knowledge about health problems caused by worms | Yes                  | 3,251 (44.9) |
|                                                 | No                   | 4,507 (62.2) |
| Walking barefoot is a cause of worm infection   | Yes                  | 2,739 (37.8) |
|                                                 | No                   | 5,889 (81.3) |
| Lack of hygiene is a cause of infection         | Yes                  | 1,357 (18.7) |
|                                                 | No                   | 5,100 (70.4) |
| Open defecation is a cause of worm infection    | Yes                  | 2,146 (29.6) |
|                                                 | No                   | 5,993 (82.7) |
| Not washing hands is a cause of worm infection  | Yes                  | 1,253 (17.3) |
|                                                 | No                   | 5,796 (80.0) |
| Toilet at home                                  | Yes                  | 1,450 (20.0) |
|                                                 | No                   | 2,306 (31.8) |
|                                                 | Yes                  | 4,940 (68.2) |

246 Data were obtained from a cross-sectional survey conducted in 2016 among in 249 villages of  
 247 the 25 provinces of Cambodia, among individuals aged 6 years and older.

248

249 Females (57.5%) were overrepresented in the sample compared to their proportion in  
 250 the Cambodian population (51.5%) as assessed by the 2013 inter-census population survey  
 251 [38]. The age distribution of the sample was very similar to that of the total Cambodian  
 252 population: children and adolescents aged up to 14 years represented 29.95% and 29.4%,  
 253 adolescents and adults aged 15 to 64 years adults represented 65.6% and 64.2%, and elderly  
 254 adults aged 65 and above represented 5.8% and 5.0% of the sample and the Cambodian  
 255 population, respectively.

256 The proportion of males and females were similar in participants excluded or included  
 257 in the analyzed sample, while children and young adults aged between 6 and 30 years were  
 258 less represented (53.0%) in the sample than among excluded participants (64.3%). Similarly,  
 259 farmers were overrepresented (53.6% of the sample vs. 41.1% of excluded participants) and

260 scholars underrepresented (34.3% of the sample vs. 51.6% of excluded participants) in the  
261 final sample. There was no difference between participants excluded from, or included in, the  
262 analyzed sample in terms of usual defecation place.

### 263 ***Strongyloides stercoralis* prevalence**

264 Overall, *S. stercoralis* prevalence was 30.7% (95% confidence interval (CI): 29.7 –  
265 31.8), ranging at province level from 10.9% (95%CI: 7.4 – 14.4) in Prey Veng province to  
266 48.2% (95%CI: 42.2 – 54.1) in Koh Kong province. Fig 1 shows the provinces of Cambodia  
267 and Fig 2 displays province level prevalence rates. Prevalence was highly variable at village  
268 level. The smallest prevalence rate, of 2.9% (95% CI: 0.1 – 14.9), was found in a village of  
269 Kandal province, where only 1 of 35 participants was infected. The highest rates were 88.9%  
270 (95%CI: 51.8 – 99.7) and 80% (95%CI: 63.1 – 91.6), observed in one village in Preah Vihear  
271 province and another village in Koh Kong province, respectively. However there were only 9  
272 participants in the Preah Vihear province village across provinces. The map presented in Fig.3  
273 displays observed *S. stercoralis* prevalence in each surveyed village.

#### **Figure 1:** Map of Cambodian provinces.

This map was created with ArcGIS version 10.0 (ESRI; Redlands, CA, USA) specifically for  
this study by Forrer et al.

274

275

#### **Figure 2:** Province-level *S. stercoralis* prevalence in 25 provinces of Cambodia

Data were obtained from a cross-sectional survey conducted in 2016 in 249 villages of  
Cambodia, among 7,246 participants aged 6 years and above.

**Figure 3:** Map of Cambodia showing observed *S. stercoralis* prevalence in the 249 study villages, Cambodia.

Data were obtained from a cross-sectional survey conducted in 2016 in 249 villages of Cambodia, among 7,246 participants aged 6 years and above. This map was created with ArcGIS version 10.0 (ESRI; Redlands, CA, USA) and display the results obtained specifically from this study by Forrer et al.

276 **Spatial correlation**

277           The model parameters of three geostatistical models, i.e. (i) model without covariates,  
278 (ii) the predictive model including only environmental variables, and (iii) the risk factor  
279 analysis model including environmental, demographic and behavioral covariates are presented  
280 in Table 2. In absence of explanatory variables, *S. stercoralis* risk clustered at a distance of 85  
281 km (range). Most of *S. stercoralis* tendency was due to environmental covariates as indicated  
282 by the range of 3.2 km after introducing environmental variables (predictive model).

283

284 **Table 2:** Parameters of three geostatistical models

|            | <b>No covariates <sup>(a)</sup></b> |              | <b>Predictive model <sup>(b)</sup></b> |              | <b>Risk factor analysis model <sup>(c)</sup></b> |               |
|------------|-------------------------------------|--------------|----------------------------------------|--------------|--------------------------------------------------|---------------|
|            | median                              | 95% BCI      | median                                 | 95% BCI      | median                                           | 95% BCI       |
| Range (km) | 85.3                                | 1.10 - 185.8 | 3.20                                   | 1.10 - 99.4  | 2.80                                             | 1.10 - 49.7   |
| $\rho$     | 3.8                                 | 1.78 - 240.0 | 105.60                                 | 3.35 - 282.6 | 116.10                                           | 6.55 - 283.60 |
| $\sigma^2$ | 0.36                                | 0.21 - 0.59  | 0.27                                   | 0.19 - 0.40  | 0.29                                             | 0.21 - 0.41   |
| DIC        |                                     |              |                                        |              | 8180.98                                          | -             |

285  $\sigma^2$  is the location-specific unexplained variance.

286  $\rho$  is the decay parameter. The range (range=3/ $\rho$ ) is the distance at which the spatial correlation  
287 becomes less than 5%.

288 <sup>(a)</sup> Geostatistical model without covariates

289 <sup>(b)</sup> Predictive model: with environmental covariates only

290 <sup>(c)</sup> Risk factor analysis model: with environmental and demographic and behavioral covariates

## 291 **Result of the model validation and predictive model**

292 The predictive ability of the geostatistical model (MSE=182.9, DIC=6894.3) including  
293 environmental covariates (predictive model) was slightly higher than that of its non-spatial  
294 counterpart (MSE = 187.7, DIC = 6894.4). Therefore the geostatistical model was used to  
295 predict *S. stercoralis* risk at non-surveyed locations. The geographical distributions of the  
296 covariates used in the geostatistical predictive model, together with elevation, are displayed in  
297 S1Figure. Odds ratios of those covariates are presented in Table 3.

298

299 **Table 3:** Results of the geostatistical predictive model

| Variable                          | Category                                 | OR    | 95% BCI      |
|-----------------------------------|------------------------------------------|-------|--------------|
| LST night dry season maximum (°C) | -                                        | 1.21  | 1.05 - 1.33  |
| Rainfall year minimum (mm/month)  | -                                        | 1.35  | 1.10 - 1.49  |
| Distance to water (km)            | -                                        | 1.10  | 0.97 - 1.22  |
| Land use, land cover              | Crops & natural vegetation mosaic, grass | 1     | -            |
|                                   | Cropland                                 | 0.82  | 0.67 - 1.03  |
|                                   | Forest and savanna                       | 1.17  | 0.89 - 1.52  |
|                                   | Water and wetlands                       | 1.29  | 0.88 - 1.91  |
| Range (km)                        | -                                        | 3.20  | 1.10 - 99.4  |
| $\rho$                            | -                                        | 105.6 | 3.35 - 282.6 |
| $\sigma^2$                        | -                                        | 0.27  | 0.19 - 0.40  |

300 LST: Land surface temperature; BCI, Bayesian credible interval; OR: odds ratio; OR in bold  
 301 are significant at 5% level

302  $\sigma^2$  is the location-specific unexplained variance.

303  $\rho$  is the decay parameter. The range ( $\text{range}=3/\rho$ ) is the distance at which the spatial correlation  
 304 becomes less than 5%.

### 305 **Risk factors for *S. stercoralis* infection**

306 The results of non-spatial bivariate mixed regressions are presented in S2 Table. The  
 307 results of the multivariate Bayesian geostatistical risk factor analysis are presented in Table 4.

308



309 **Table 4:** Results of the risk factor analysis

|                                                           |                            | <i>S. stercoralis</i><br>negative<br>N = 5,019 | <i>S. stercoralis</i><br>positive<br>N = 2,227 |             |                |
|-----------------------------------------------------------|----------------------------|------------------------------------------------|------------------------------------------------|-------------|----------------|
| <b>Variable</b>                                           | <b>Category</b>            | <b>n (%)</b>                                   | <b>n (%)</b>                                   | <b>OR</b>   | <b>95% BCI</b> |
| Sex <sup>(a)</sup>                                        | Male                       | 2,138 (69.4)                                   | 943 (30.6)                                     | 1.00        | -              |
|                                                           | Female                     | 2,881 (69.2)                                   | 1,284 (30.8)                                   | <b>0.87</b> | 0.67 - 1.12    |
| Effect of age among men (years) <sup>(b)</sup>            | 6 - 12                     | 746 (82.8)                                     | 155 (17.2)                                     | 1.00        | -              |
|                                                           | 13 - 18                    | 335 (73.6)                                     | 120 (26.4)                                     | <b>1.9</b>  | 1.44 - 2.50    |
|                                                           | 19 - 30                    | 301 (72.0)                                     | 117 (28.0)                                     | <b>2.14</b> | 1.61 - 2.85    |
|                                                           | 31 - 50                    | 452 (64.1)                                     | 253 (35.9)                                     | <b>3.15</b> | 2.49 - 4.07    |
|                                                           | ≥ 50                       | 304 (50.5)                                     | 298 (49.5)                                     | <b>6.11</b> | 4.82 - 7.85    |
| Interaction: effect of age among women (years)            | 6-12                       | 717 (84.8)                                     | 129 (15.2)                                     | 1.00        | -              |
|                                                           | 13 - 18                    | 381 (76.4)                                     | 118 (23.6)                                     | <b>1.89</b> | 1.41 - 2.51    |
|                                                           | 19 - 30                    | 505 (79.8)                                     | 219 (30.2)                                     | <b>2.67</b> | 2.06 - 3.46    |
|                                                           | 31 - 50                    | 715 (62.5)                                     | 430 (37.5)                                     | <b>4.01</b> | 3.17 - 5.10    |
|                                                           | ≥ 50                       | 563 (59.2)                                     | 388 (40.8)                                     | <b>4.79</b> | 3.77 - 6.07    |
| Interaction: females compared to males, in each age group | 6-12                       | -                                              | -                                              | 1.00        | -              |
|                                                           | 13 - 18                    | -                                              | -                                              | 0.86        | 0.64 - 1.18    |
|                                                           | 19 - 30                    | -                                              | -                                              | 1.08        | 0.82 - 1.43    |
|                                                           | 31 - 50                    | -                                              | -                                              | 1.1         | 0.89 - 1.36    |
|                                                           | ≥ 50                       | -                                              | -                                              | <b>0.68</b> | 0.55 - 0.85    |
| Usual defecation place                                    | Toilet                     | 3,503 (70.6)                                   | 1,458 (29.4)                                   | 1.00        | -              |
|                                                           | Forest                     | 1,180 (66.7)                                   | 588 (33.3)                                     | <b>1.24</b> | 1.06 - 1.45    |
|                                                           | River, rice field, other   | 336 (65.0)                                     | 181 (35.0)                                     | <b>1.41</b> | 1.12 - 1.80    |
| Knowledge of signs of worm infection                      | No                         | 3,117 (69.2)                                   | 1,390 (30.8)                                   | 1.00        | -              |
|                                                           | Yes                        |                                                |                                                | <b>0.86</b> | 0.75 - 0.98    |
| Land use, land cover                                      | Crops & natural vegetation |                                                |                                                |             |                |
|                                                           | mosaic, grass              | 2,676 (69.0)                                   | 1,204 (31.0)                                   | 1.00        | -              |
|                                                           | Cropland                   | 1,281 (73.8)                                   | 456 (26.2)                                     | <b>0.81</b> | 0.64 - 0.997   |
|                                                           | Forest and savanna         | 802 (65.0)                                     | 431 (35.0)                                     | 1.21        | 0.92 - 1.57    |
| Water and wetlands                                        | 260 (65.7)                 | 136 (34.3)                                     | 1.27                                           | 0.86 - 1.91 |                |
|                                                           |                            | <b>Median (IQR)</b>                            | <b>Median (IQR)</b>                            |             |                |
| LST night dry season maximum (°C)                         | -                          | 26.1 (1.4)                                     | 27.0 (1.6)                                     | <b>1.22</b> | 1.09 - 1.35    |

|                                  |   |             |             |               |                |
|----------------------------------|---|-------------|-------------|---------------|----------------|
| Rainfall year minimum (mm/month) | - | 0.81 (0.70) | 0.89 (0.91) | <b>1.38</b>   | 1.23 - 1.53    |
| Distance to water (km)           | - | 14.9 (26.2) | 16.0 (31.1) | <b>1.12</b>   | 1.01 - 1.25    |
| <b>Model parameters</b>          |   |             |             | <b>Median</b> | <b>95% BCI</b> |
| Range (km)                       | - | -           | -           | 2.80          | 1.10 - 49.7    |
| $\rho$                           | - | -           | -           | 116.1         | 6.55 - 283.60  |
| $\sigma^2$                       | - | -           | -           | 0.2914        | 0.21 - 0.41    |

310

311 LST: Land surface temperature; BCI, Bayesian credible interval; OR: odds ratio; OR in bold  
312 are significant at 5% level

313  $\sigma^2$  is the location-specific unexplained variance.

314  $\rho$  is the decay parameter. The range (range=3/ $\rho$ ) is the distance at which the spatial correlation  
315 becomes less than 5%.

316 <sup>(a)</sup> Main effect of sex. Due to the interaction the OR corresponds to the effect of sex among  
317 the baseline age group (6-12 years).

318 <sup>(b)</sup> Main effect of age. Due to the interaction, the OR corresponds to the effect of age among  
319 males.

320 Results were obtained with the multivariate geostatistical model and data from a cross-  
321 sectional survey conducted in 2016 among 7,246 participants living in 249 villages across the  
322 25 provinces of Cambodia.

323

324 Sex was an effect modifier of age. Infection risk increased with age for both genders  
325 but women aged 50 years and above had a lower risk of being infected than males. The  
326 relationship between *S. stercoralis* infection risk and age is presented in Figure 4. Participants  
327 usually practicing open defecation (31.5% of participants defecating either in forests, or rice  
328 field and water) had higher odds of being infected, while individuals who had some  
329 knowledge about health problems resulting from worm infection has lower odds of harboring  
330 *S. stercoralis*. As for environmental factors, *S. stercoralis* infection risk was positively  
331 associated with increasing night land surface temperature (LST night) dry season maximum,  
332 increasing minimum year rainfall and increasing distance to water. Finally, the odds of *S.*

333 *stercoralis* infection were lower among participants living in villages located in croplands, i.e.  
334 rice fields.

**Figure 4:** Smoothed age-prevalence of *S. stercoralis*, Cambodia

Data were obtained from a cross-sectional survey conducted in 2016 in 249 villages of Cambodia, among 7,246 participants aged 6 years and above. Restricted cubic splines were used. Data are stratified for males (A) and females (B). Uncertainty is expressed as 95% confidence interval (CI).

335 **Spatial prediction of *S. stercoralis* infection risk**

336 Figure 5 and 6 display the predicted median *S. stercoralis* prevalence in Cambodia and  
337 the lower and upper estimates, respectively. Prevalence was consistently higher than 10%  
338 except in a small area of Prey Veng province. *S. stercoralis* predicted risk was below 20%  
339 only in five provinces, i.e. Kampong Cham, Tboung Khmum, Prey Veng, Kandal and Svay  
340 Rieng. Predicted prevalence was particularly high in the north of Preah Vihear and Stung  
341 Treng provinces near the Lao border, as well as in the South, in areas of Kampong Speu, Koh  
342 Kong, Preah Sihanouk, and Kampot provinces.

343

344

345 **Discussion**

346 We present here, to our knowledge, the first national prevalence estimate and nation-  
347 wide infection risk map of *S. stercoralis*. The infection is ubiquitous in Cambodia. Based on a  
348 sample encompassing all the 25 country provinces and including over 7,200 participants, *S.*  
349 *stercoralis* occurs in Cambodia at prevalence rates systematically over 10%, with a national  
350 prevalence of 30%.

351 Infection risk was the lowest in the Southeast of the country, i.e. in the provinces of  
352 Prey Veng, Kandal, Kampong Cham, as well as the West and South parts of Tboung Khmum  
353 and Kampong Thom provinces, respectively. The highest province-level prevalence rates,  
354 above 40%, were found in Preah Vihear in the North, Kampong Chhnang in the Centre and in  
355 the South, Koh Kong and Kampong Speu.

356 The size of *S. stercoralis* infection clusters was relatively small, 85 km, similarly to  
357 that observed for hookworm infection risk in the country [25]. Almost all spatial correlation  
358 of *S. stercoralis* infection was explained by its association with environmental factors (as  
359 indicated by the dramatic drop of the range, down to 3.2 km, after introducing environmental  
360 covariates in the model). This result is not surprising as in absence of available treatment the  
361 parasite biological requirements would mostly condition its distribution. The distribution of  
362 hookworm prevalence among school-aged children in Cambodia was similar to that of *S.*  
363 *stercoralis*, likely due to the resembling transmission routes of those two nematodes. Yet, the  
364 area with lower hookworm prevalence was larger, probably because of ongoing STH  
365 deworming programs [25].

366 The odds of being infected increased with increasing maximum night temperature and  
367 increasing minimum rainfall. In presence of sufficient humidity hookworm has a good  
368 tolerance for high temperatures with its larvae having the ability to migrate in the soil, and *S.*  
369 *stercoralis* larvae might have the same ability [39]. The positive association between  
370 temperature and risk is more surprising, although this might relate to a particularity of *S.*  
371 *stercoralis* life cycle. The number of females and infective larvae developing in the external  
372 environment depends on temperature, with numbers of infective larvae being maximum when  
373 temperatures are of 30°C and above [11]. Hence, night maximum temperatures which range  
374 between 24°C and 32°C in Cambodia might have an impact on the amount of infective larvae  
375 present in the environment.

376           Regarding the environmental predictors of *S. stercoralis* infection, distance to water  
377 and the land cover category of cropland were not significantly associated with infection risk  
378 in the predictive model but became significant in the risk factor analysis after adjusting for  
379 demographic and behavioral factors. We found a positive association between *S. stercoralis*  
380 infection risk and distance to water. The development and survival of *S. stercoralis* larvae is  
381 affected by immersion, so seasonal flooding might affect their survival in areas close to water  
382 bodies [40, 41]. Similarly, this relationship between larvae survival and water might explain  
383 the lower infection in areas occupied by croplands, which mostly correspond to rice fields that  
384 are regularly flooded. Yet it is also possible that distance to water captured other unmeasured  
385 features, including factors relating to socio-economic features and human activity [27]. In  
386 Cambodia, people have a clear preference for pour-flush latrines and would rather not have a  
387 toilet than pit latrines, but pour flush latrines function only with water [42]. Limited  
388 availability of water due to living away from permanent water bodies might result in  
389 decreased access to, or use of, sanitation facilities.

390           Studies that investigated risk factors for *S. stercoralis* infection mostly report a higher  
391 risk in men, whereas the relationship between age and *S. stercoralis* prevalence seems to vary  
392 across settings [9, 10, 43, 44]. In this national survey among more than 7,200 individuals aged  
393 six years and above, we found that prevalence increased with age both in men and women,  
394 although men aged 50 years and above had higher odds of *S. stercoralis* infection than women  
395 of the same age. Boys aged between 6 and 12 years were also more likely to harbor *S.*  
396 *stercoralis* than their female counterparts. Previously to this national survey, prevalence was  
397 found to increase with age and reach a plateau in adulthood in North Cambodia, while no  
398 cases were found in individuals aged less than 15 years in Yunnan, China [9, 45, 46]. Yet, no  
399 association between age and *S. stercoralis* infection was found in Lao PDR, South Cambodia,

400 or Zanzibar [10, 44, 47]. Age-specific infection risk is of particular importance to target  
401 control programs and should be further documented.

402 An interesting finding was that individuals who declared having some knowledge  
403 about health problems caused by worm infections had lower odds of being infected with *S.*  
404 *stercoralis*, but having some knowledge about sources of infection was not associated with  
405 infection risk. While knowledge does not necessarily translate into behavior change, this  
406 result suggests that being aware of personal disease risk, –which is an important driver in  
407 health promotion and increases compliance to helminth control programs– might be a better  
408 trigger of hygienic behavior than knowing exposure sources [48, 49].

409 The protective effect of improved sanitation against STH infection is widely  
410 acknowledged [50-54]. We found that, compared to open defecation, defecating in latrines  
411 was protective against *S. stercoralis* infection. This result is in line with other studies  
412 conducted in Cambodia or Ecuador, and with a recent meta-analysis that included 9 studies  
413 investigating the impact of sanitation on *S. stercoralis* infection risk, and estimated a pooled  
414 OR of 0.50 (95%CI: 0.36-0.70) [9, 10, 54-57]. Of note, village-level sanitation coverage was  
415 also found to reduce re-infection risk one year after treatment in North Cambodia [46].

416 The present work has several limitations. First, women were overrepresented in the  
417 sample compared to the general Cambodian population and the lower prevalence among  
418 young girls and women aged 50 years and above, compared to males, might have resulted in a  
419 slight underestimation of prevalence. Most importantly, our sample was representative of the  
420 2013 Cambodian general population in terms of age, which is strongly associated with  
421 infection risk [38].

422 Second, it was the first time that the serological diagnostic method of detecting IgG  
423 anti-bodies employed in this study was used for a large-scale survey. This method has proven

424 a high sensitivity for *S. stercoralis* detection, and it does not suffer from cross-reactivity with  
425 other STH [20, 21]. However, validation of the method in different settings should be carried  
426 out. Finally, our risk factor analysis did not adjust for socio-economic status which was found  
427 associated with infection risk in North Cambodia, but results from the few studies that  
428 accounted for it are heterogeneous [9, 10, 46, 58, 59]. Given the strong association between  
429 poverty and other STH infections, it is likely that *S. stercoralis* risk distribution is also  
430 associated with socioeconomic status and future studies should account for it. Of note, the  
431 socioeconomic status was not a confounder of the relationship between age or sex and *S.*  
432 *stercoralis* infection risk in North Cambodia and would probably not have substantially  
433 affected the estimates for sex and age in the present study [46, 59].

434 Our study represents a clear risk map of *S. stercoralis* of a highly endemic setting.  
435 Based on these data the population at risk can be quantified and planning of concrete control  
436 approach become realistic. Further developing this operational approach in other settings and  
437 with further validated diagnostic approaches will result in data bases for global planning. The  
438 mainstay of the WHO strategy to control soil-transmitted helminths is preventive  
439 chemotherapy, i.e. the regular treatment with mebendazole or albendazole to prevent high  
440 intensity infections and the associated morbidity to entire populations or at-risk groups [60,  
441 61]. However those drugs are not efficacious at a single oral dose against *S. stercoralis* for  
442 which the drug of choice is ivermectin [62-64]. A single oral dose (200µg/kg Body Weight)  
443 of ivermectin has recently been found to achieve a high cure rate and result in re-infection  
444 rates below 15%, one year after treatment in a highly endemic setting of Cambodia [46, 62,  
445 63]. As our results demonstrate, *S. stercoralis* is highly endemic in all provinces in Cambodia  
446 and the inclusion of ivermectin in the control program would be required [13, 64, 65]. Yet,  
447 this drug is not subsidized in in regions where onchocerciasis is absent, let alone to treat *S.*  
448 *stercoralis*, and its high cost in Cambodia, 10 USD per tablet –while up to 5 tablets may be

449 needed to treat an individual, depending on their weight—, precludes the deployment of control  
450 measures in the country.

451 In absence of data on age specific morbidity, the fact that individuals of any age  
452 appear to have the same risk for reinfection one year after treatment suggests community-  
453 wide control [46]. Yet, it appeared in a study investigating *S. stercoralis* related morbidity in  
454 Cambodia that children and adolescents with higher parasite loads had higher odds of being  
455 stunted, while *S. stercoralis* infection was found to be associated with anemia but not stunting  
456 in Argentina [17, 66]. The relationship between *S. stercoralis* parasite loads, morbidity and  
457 transmission intensity needs to be assessed, as well as age-related infection levels, using  
458 appropriately designed longitudinal studies. Cost-effectiveness studies of various control  
459 options are needed while mathematical models could help better appraising the parasite  
460 transmission dynamics and guide control efforts, as the complex life cycle of *S. stercoralis*  
461 life might yield transmission dynamics that are different from the other STH.

462 Cambodia benefits from a well-established STH control network and was among the  
463 first countries to reach the 75% national coverage target [67, 68]. STH control was recently  
464 scaled up to reach children in secondary and high schools, including in private schools, and  
465 women of child bearing age in factories [69]. Additionally, schistosomiasis has been  
466 successfully controlled with no severe cases recorded recently and lymphatic filariasis has  
467 been eliminated as a public health problem and is now under surveillance for elimination [68,  
468 70, 71].

469 However, in this country that has demonstrated its capacity to efficiently address  
470 helminthic infections, the control of *S. stercoralis* is currently hindered by the high cost of  
471 ivermectin, which cannot be entirely supported by the Ministry of Health. Either  
472 subsidizations, donations, or the production of affordable generics are necessary to start  
473 tackling this dangerous parasite that infects almost a third of the Cambodian population.



474 **Acknowledgements**

475           We are grateful to all of the study participants. Our sincere thanks go to the laboratory  
476 technicians and staff at the Helminth Control Program of the National Centre for Parasitology,  
477 Entomology and Malaria Control, Phnom Penh, Cambodia, and the staff of the laboratory  
478 staff of the Parasitology department of the Khon Kaen University, Khon Kaen, Thailand. We  
479 thank the Provincial Health Departments of all provinces for their support and field work, and  
480 the local authorities for their support.

481

482

## References

1. Schär F, Trostorf U, Giardina F, Khieu V, Muth S, Marti H, et al. *Strongyloides stercoralis*: Global Distribution and Risk Factors. *PLoS Negl Trop Dis*. 2013;7(7).
2. Olsen A, van Lieshout L, Marti H, Polderman T, Polman K, Steinmann P, et al. Strongyloidiasis - the most neglected of the neglected tropical diseases? *Trans R Soc Trop Med Hyg*. 2009;103(10):967-72. doi: 10.1016/j.trstmh.2009.02.013. PubMed PMID: 19328508.
3. Montes M, Sawhney C, Barros N. *Strongyloides stercoralis*: there but not seen. *Curr Opin Infect Dis*. 2010;23(5):500-4. doi: 10.1097/QCO.0b013e32833df718. PubMed PMID: 20733481; PubMed Central PMCID: PMC2948977.
4. Bisoffi Z, Buonfrate D, Montresor A, Requena-Méndez A, Muñoz J, Krolewiecki AJ, et al. *Strongyloides stercoralis*: a plea for action. *PLoS Negl Trop Dis*. 2013;7(5):e2214. doi: 10.1371/journal.pntd.0002214. PubMed PMID: 23675546; PubMed Central PMCID: PMC3649953.
5. Krolewiecki AJ, Lammie P, Jacobson J, Gabrielli AF, Levecke B, Socias E, et al. A public health response against *Strongyloides stercoralis*: time to look at soil-transmitted helminthiasis in full. *PLoS Negl Trop Dis*. 2013;7(5):e2165. doi: 10.1371/journal.pntd.0002165. PubMed PMID: 23675541; PubMed Central PMCID: PMC3649958.
6. Genta RM. Global prevalence of strongyloidiasis: critical review with epidemiologic insights into the prevention of disseminated disease. *Reviews of infectious diseases*. 1989;11(5):755-67. PubMed PMID: 2682948.
7. de Silva NR, Brooker S, Hotez PJ, Montresor A, Engels D, Savioli L. Soil-transmitted helminth infections: updating the global picture. *Trends Parasitol*. 2003;19(12):547-51. PubMed PMID: 14642761.
8. Pullan RL, Smith JL, Jasrasaria R, Brooker SJ. Global numbers of infection and disease burden of soil transmitted helminth infections in 2010. *Parasit Vectors*. 2014;7:37. doi: 10.1186/1756-3305-7-37. PubMed PMID: 24447578; PubMed Central PMCID: PMC3905661.
9. Khieu V, Schar F, Forrer A, Hattendorf J, Marti H, Duong S, et al. High prevalence and spatial distribution of *Strongyloides stercoralis* in rural Cambodia. *PLoS Negl Trop Dis*. 2014;8(6):e2854. doi: 10.1371/journal.pntd.0002854. PubMed PMID: 24921627; PubMed Central PMCID: PMC4055527.
10. Khieu V, Schar F, Marti H, Bless PJ, Char MC, Muth S, et al. Prevalence and risk factors of *Strongyloides stercoralis* in Takeo Province, Cambodia. *Parasit Vectors*. 2014;7:221. doi: 10.1186/1756-3305-7-221. PubMed PMID: 24886763; PubMed Central PMCID: PMC4029906.
11. Grove DI. Human strongyloidiasis. *Adv Parasitol*. 1996;38:251-309. PubMed PMID: 8701797.
12. Keiser PB, Nutman TB. *Strongyloides stercoralis* in the Immunocompromised Population. *Clin Microbiol Rev*. 2004;17(1):208-17. PubMed PMID: 14726461; PubMed Central PMCID: PMC321465.
13. Nutman TB. Human infection with *Strongyloides stercoralis* and other related *Strongyloides* species. *Parasitology*. 2016;1-11. doi: 10.1017/S0031182016000834. PubMed PMID: 27181117.
14. Marcos LA, Terashima A, Dupont HL, Gotuzzo E. *Strongyloides* hyperinfection syndrome: an emerging global infectious disease. *Trans R Soc Trop Med Hyg*. 2008;102(4):314-8. doi: 10.1016/j.trstmh.2008.01.020. PubMed PMID: 18321548.
15. Becker SL, Sieto B, Silue KD, Adjossan L, Kone S, Hatz C, et al. Diagnosis, clinical features, and self-reported morbidity of *Strongyloides stercoralis* and hookworm infection in a co-endemic setting. *PLoS Negl Trop Dis*. 2011;5(8):e1292. doi: 10.1371/journal.pntd.0001292. PubMed PMID: 21886853; PubMed Central PMCID: PMC3160297.
16. Khieu V, Srey S, Schar F, Muth S, Marti H, Odermatt P. *Strongyloides stercoralis* is a cause of abdominal pain, diarrhea and urticaria in rural Cambodia. *BMC Res Notes*. 2013;6:200. doi: 10.1186/1756-0500-6-200. PubMed PMID: 23688049; PubMed Central PMCID: PMC4055527.
17. Forrer A, Khieu V, Schar F, Hattendorf J, Marti H, Neumayr A, et al. *Strongyloides stercoralis* is associated with significant morbidity in rural Cambodia, including stunting in children. *PLoS Negl Trop Dis*. 2017;11(10):e0005685. doi: 10.1371/journal.pntd.0005685. PubMed PMID: 29059195; PubMed Central PMCID: PMC5695629.

18. Requena-Méndez A, Chiodini P, Bisoffi Z, Buonfrate D, Gotuzzo E, Munoz J. The laboratory diagnosis and follow up of strongyloidiasis: a systematic review. *PLoS Negl Trop Dis*. 2013;7(1):e2002. doi: 10.1371/journal.pntd.0002002. PubMed PMID: 23350004; PubMed Central PMCID: PMC3547839.
19. Siddiqui AA, Berk SL. Diagnosis of *Strongyloides stercoralis* infection. *Clinical infectious diseases : an official publication of the Infectious Diseases Society of America*. 2001;33(7):1040-7. doi: 10.1086/322707. PubMed PMID: 11528578.
20. Eamudomkarn C, Sithithaworn P, Sithithaworn J, Kaewkes S, Sripa B, Itoh M. Comparative evaluation of *Strongyloides ratti* and *S. stercoralis* larval antigen for diagnosis of strongyloidiasis in an endemic area of opisthorchiasis. *Parasitol Res*. 2015;114(7):2543-51. doi: 10.1007/s00436-015-4458-3. PubMed PMID: 25877389.
21. Eamudomkarn C, Sithithaworn P, Kamamia C, Yakovleva A, Sithithaworn J, Kaewkes S, et al. Diagnostic performance of urinary IgG antibody detection: A novel approach for population screening of strongyloidiasis. *PLoS ONE*. 2018;13(7):e0192598. doi: 10.1371/journal.pone.0192598. PubMed PMID: 29985913; PubMed Central PMCID: PMC6037348.
22. Raso G, Matthys B, N'Goran EK, Tanner M, Vounatsou P, Utzinger J. Spatial risk prediction and mapping of *Schistosoma mansoni* infections among schoolchildren living in western Côte d'Ivoire. *Parasitology*. 2005;131(Pt 1):97-108.
23. Chammartin F, Guimaraes LH, Scholte RG, Bavia ME, Utzinger J, Vounatsou P. Spatio-temporal distribution of soil-transmitted helminth infections in Brazil. *Parasit Vectors*. 2014;7:440. doi: 10.1186/1756-3305-7-440. PubMed PMID: 25230810; PubMed Central PMCID: PMC4262198.
24. Chammartin F, Scholte RG, Malone JB, Bavia ME, Nieto P, Utzinger J, et al. Modelling the geographical distribution of soil-transmitted helminth infections in Bolivia. *Parasit Vectors*. 2013;6:152. doi: 10.1186/1756-3305-6-152. PubMed PMID: 23705798; PubMed Central PMCID: PMC3681678.
25. Karagiannis-Voules DA, Odermatt P, Biedermann P, Khieu V, Schar F, Muth S, et al. Geostatistical modelling of soil-transmitted helminth infection in Cambodia: do socioeconomic factors improve predictions? *Acta Trop*. 2015;141(Pt B):204-12. doi: 10.1016/j.actatropica.2014.09.001. PubMed PMID: 25205492.
26. Lai YS, Zhou XN, Utzinger J, Vounatsou P. Bayesian geostatistical modelling of soil-transmitted helminth survey data in the People's Republic of China. *Parasit Vectors*. 2013;6:359. doi: 10.1186/1756-3305-6-359. PubMed PMID: 24350825; PubMed Central PMCID: PMC3892068.
27. Soares Magalhães RJ, Salamat MS, Leonardo L, Gray DJ, Carabin H, Halton K, et al. Mapping the Risk of Soil-Transmitted Helminthic Infections in the Philippines. *PLoS Negl Trop Dis*. 2015;9(9):e0003915. doi: 10.1371/journal.pntd.0003915. PubMed PMID: 26368819; PubMed Central PMCID: PMC4569387.
28. Brooker S, Kabatereine NB, Tukahebwa EM, Kazibwe F. Spatial analysis of the distribution of intestinal nematode infections in Uganda. *Epidemiology and infection*. 2004;132(6):1065-71. PubMed PMID: 15635963; PubMed Central PMCID: PMC1975758.
29. Clements ACA, Lwambo NJS, Blair L, Nyandindi U, Kaatano G, Kinung'hi S, et al. Bayesian spatial analysis and disease mapping: tools to enhance planning and implementation of a schistosomiasis control programme in Tanzania. *TropMedIntHealth*. 2006;11(4):490-503.
30. CNM. National Policy and Guideline for Helminth Control in Cambodia. Phnom Penh, Cambodia: National Center for Parasitology, Entomology and Malaria Control, Ministry of Health; 2004. 44 p.
31. WorldBank. Human Development Indicators 2016 [23.03.2017]. Available from: <http://hdr.undp.org/en/countries/profiles/KHM>.
32. Unicef. The State of the World's Children 2016 Statistical Tables. 2016.
33. Khieu V, Or V, Tep C, Odermatt P, Tsuyuoka R, Char MC, et al. How elimination of lymphatic filariasis as a public health problem in the Kingdom of Cambodia was achieved. *Infect Dis Poverty*. 2018;7(1):15. doi: 10.1186/s40249-018-0394-7. PubMed PMID: 29463307; PubMed Central PMCID: PMC5819284.

34. Gelfand AE, Smith AFM. Sampling-based approaches to calculating marginal densities. *Journal of the American Statistical Association*. 1990;85(410):398-409.
35. Lunn D, Thomas A, Best N, Spiegelhalter D. WinBUGS - A Bayesian modelling framework: Concepts, structure, and extensibility. *Statistics and Computing*. 2000;10(4):325-37. doi: 10.1023/a:1008929526011.
36. Spiegelhalter DJ, Best NG, Carlin BP, Van Der Linde A. Bayesian measures of model complexity and fit. *Journal of the Royal Statistical Society: Series B (Statistical Methodology)*. 2002;64(4):583-639.
37. Diggle PJ, Tawn JA, Moyeed RA. Model-based geostatistics. *Journal of the Royal Statistical Society: Series C (Applied Statistics)*. 1998;47(3):299-350.
38. National Institute of Statistics MoP. Cambodia inter-censal population survey 2013, final report 2013.
39. Brooker S, Bethony J, Hotez PJ. Human hookworm infection in the 21st century. *AdvParasitol*. 2004;58:197-288.
40. Anamnart W, Pattanawongsa A, Intapan PM, Morakote N, Janwan P, Maleewong W. Detrimental effect of water submersion of stools on development of *Strongyloides stercoralis*. *PLoS ONE*. 2013;8(12):e82339. doi: 10.1371/journal.pone.0082339. PubMed PMID: 24358173; PubMed Central PMCID: PMC3864946.
41. Cimino RO, Krolewiecki A. The Epidemiology of Human Strongyloidiasis. *Current Tropical Medicine Reports*. 2014;1(4):216-22.
42. Pedi D SM, Sophea P, Jenkins M. Rural consumer sanitation adoption study - An analysis of rural consumers in the emerging sanitation market in Cambodia. 2014.
43. Steinmann P, Zhou XN, Li YL, Li HJ, Chen SR, Yang Z, et al. Helminth infections and risk factor analysis among residents in Eryuan county, Yunnan province, China. *Acta Trop*. 2007;104(1):38-51.
44. Knopp S, Mohammed KA, Stothard JR, Khamis IS, Rollinson D, Marti H, et al. Patterns and risk factors of helminthiasis and anemia in a rural and a peri-urban community in Zanzibar, in the context of helminth control programs. *PLoS Negl Trop Dis*. 2010;4(5):e681. doi: 10.1371/journal.pntd.0000681. PubMed PMID: 20485491; PubMed Central PMCID: PMC2867941.
45. Steinmann P, Zhou XN, Du ZW, Jiang JY, Wang LB, Wang XZ, et al. Occurrence of *Strongyloides stercoralis* in Yunnan Province, China, and comparison of diagnostic methods. *PLoS Negl Trop Dis*. 2007;1(1):e75. doi: 10.1371/journal.pntd.0000075. PubMed PMID: 17989788; PubMed Central PMCID: PMC2041812.
46. Forrer A, Khieu V, Schindler C, Schär F, Marti H, Char MC, et al. Ivermectin Treatment and Sanitation Effectively Reduce *Strongyloides stercoralis* Infection Risk in Rural Communities in Cambodia. *PLoS Negl Trop Dis*. 2016;10(8):e0004909. doi: 10.1371/journal.pntd.0004909. PubMed PMID: 27548286.
47. Vonghachack Y, Sayasone S, Bouakhasith D, Taisayavong K, Akkavong K, Odermatt P. Epidemiology of *Strongyloides stercoralis* on Mekong islands in Southern Laos. *Acta Trop*. 2014. doi: 10.1016/j.actatropica.2014.09.016. PubMed PMID: 25291044.
48. Krentel A, Fischer PU, Weil GJ. A review of factors that influence individual compliance with mass drug administration for elimination of lymphatic filariasis. *PLoS Negl Trop Dis*. 2013;7(11):e2447. doi: 10.1371/journal.pntd.0002447. PubMed PMID: 24278486; PubMed Central PMCID: PMC3836848.
49. Palmeirim MS, Ouattara M, Esse C, Koffi VA, Assare RK, Hurlimann E, et al. Are schoolchildren less infected if they have good knowledge about parasitic worms? A case study from rural Cote d'Ivoire. *BMC Public Health*. 2018;18(1):951. doi: 10.1186/s12889-018-5776-z. PubMed PMID: 30071839.
50. Strunz EC, Addiss DG, Stocks ME, Ogden S, Utzinger J, Freeman MC. Water, sanitation, hygiene, and soil-transmitted helminth infection: a systematic review and meta-analysis. *PLoS Med*. 2014;11(3):e1001620. doi: 10.1371/journal.pmed.1001620. PubMed PMID: 24667810; PubMed Central PMCID: PMC3965411.

51. Freeman MC, Ogden S, Jacobson J, Abbott D, Addiss DG, Amnie AG, et al. Integration of water, sanitation, and hygiene for the prevention and control of neglected tropical diseases: a rationale for inter-sectoral collaboration. *PLoS Negl Trop Dis*. 2013;7(9):e2439. doi: 10.1371/journal.pntd.0002439. PubMed PMID: 24086781; PubMed Central PMCID: PMC3784463.
52. Freeman MC, Clasen T, Dreifelbis R, Saboori S, Greene LE, Brumback B, et al. The impact of a school-based water supply and treatment, hygiene, and sanitation programme on pupil diarrhoea: a cluster-randomized trial. *Epidemiology and Infection*. 2014;142(2):340-51. doi: 10.1017/S0950268813001118. PubMed PMID: 23702047.
53. Ziegelbauer K, Speich B, Mausezahl D, Bos R, Keiser J, Utzinger J. Effect of sanitation on soil-transmitted helminth infection: systematic review and meta-analysis. *PLoS Med*. 2012;9(1):e1001162. doi: 10.1371/journal.pmed.1001162. PubMed PMID: 22291577; PubMed Central PMCID: PMC3265535.
54. Echazu A, Bonanno D, Juarez M, Cajal SP, Heredia V, Caropresi S, et al. Effect of Poor Access to Water and Sanitation As Risk Factors for Soil-Transmitted Helminth Infection: Selectiveness by the Infective Route. *PLoS Negl Trop Dis*. 2015;9(9):e0004111. doi: 10.1371/journal.pntd.0004111. PubMed PMID: 26421865; PubMed Central PMCID: PMC4589369.
55. Freeman MC, Garn JV, Sclar GD, Boisson S, Medicott K, Alexander KT, et al. The impact of sanitation on infectious disease and nutritional status: A systematic review and meta-analysis. *Int J Hyg Environ Health*. 2017;220(6):928-49. doi: 10.1016/j.ijheh.2017.05.007. PubMed PMID: 28602619.
56. Khieu V, Schär F, Marti H, Sayasone S, Duong S, Muth S, et al. Diagnosis, treatment and risk factors of *Strongyloides stercoralis* in schoolchildren in Cambodia. *PLoS Negl Trop Dis*. 2013;7(2).
57. Moore CE, Nget P, Saroeun M, Kuong S, Chanthou S, Kumar V, et al. Intestinal parasite infections in symptomatic children attending hospital in Siem Reap, Cambodia. *PLoS One*. 2015;10(5):e0123719. doi: 10.1371/journal.pone.0123719. PubMed PMID: 25951607; PubMed Central PMCID: PMC4423887.
58. Conlan JV, Khamlome B, Vongxay K, Elliot A, Pallant L, Sripa B, et al. Soil-transmitted helminthiasis in Laos: a community-wide cross-sectional study of humans and dogs in a mass drug administration environment. *Am J Trop Med Hyg*. 2012;86(4):624-34. doi: 10.4269/ajtmh.2012.11-0413. PubMed PMID: 22492147; PubMed Central PMCID: PMC3403769.
59. Forrer A, Khieu V, Schar F, Vounatsou P, Chammartin F, Marti H, et al. *Strongyloides stercoralis* and hookworm co-infection: spatial distribution and determinants in Preah Vihear Province, Cambodia. *Parasit Vectors*. 2018;11(1):33. doi: 10.1186/s13071-017-2604-8. PubMed PMID: 29329561; PubMed Central PMCID: PMC5767026.
60. WHO, Crompton DW. Preventive chemotherapy in human helminthiasis: coordinated use of anthelmintic drugs in control interventions: a manual for health professionals and programme managers. Geneva: World Health Organization 2006. 62 p.
61. WHO. First WHO report on neglected tropical diseases: "Working to overcome the global impact of neglected tropical diseases". Geneva: World Health Organization. 2010.
62. Gann PH, Neva FA, Gam AA. A randomized trial of single- and two-dose ivermectin versus thiabendazole for treatment of strongyloidiasis. *J Infect Dis*. 1994;169(5):1076-9. PubMed PMID: 8169394.
63. Igual-Adell R, Oltra-Alcaraz C, Soler-Company E, Sánchez-Sánchez P, Matogo-Oyana J, Rodríguez-Calabuig D. Efficacy and safety of ivermectin and thiabendazole in the treatment of strongyloidiasis. *Expert Opin Pharmacother*. 2004;5(12):2615-9.
64. Henriquez-Camacho C, Gotuzzo E, Echevarria J, White AC, Jr., Terashima A, Samalvides F, et al. Ivermectin versus albendazole or thiabendazole for *Strongyloides stercoralis* infection. *The Cochrane database of systematic reviews*. 2016;1:CD007745. doi: 10.1002/14651858.CD007745.pub3. PubMed PMID: 26778150.
65. WHO. WHO Model formulary 2008. Department of Essential Medicines and Pharmaceutical Policies W, Geneva, editor. Geneva: WHO; 2009.

66. Echazu A, Juarez M, Vargas PA, Cajal SP, Cimino RO, Heredia V, et al. Albendazole and ivermectin for the control of soil-transmitted helminths in an area with high prevalence of *Strongyloides stercoralis* and hookworm in northwestern Argentina: A community-based pragmatic study. *PLoS Negl Trop Dis*. 2017;11(10):e0006003. doi: 10.1371/journal.pntd.0006003. PubMed PMID: 28991899; PubMed Central PMCID: PMC5648268.
67. Sinuon M, Tsuyuoka R, Socheat D, Montresor A, Palmer K. Financial costs of deworming children in all primary schools in Cambodia. *Trans R Soc Trop Med Hyg*. 2005;99(9):664-8. doi: 10.1016/j.trstmh.2004.12.004. PubMed PMID: 15992839.
68. Montresor A, Cong DT, Sinuon M, Tsuyuoka R, Chanthavisouk C, Strandgaard H, et al. Large-scale preventive chemotherapy for the control of helminth infection in Western Pacific countries: six years later. *PLoS Negl Trop Dis*. 2008;2(8):e278. doi: 10.1371/journal.pntd.0000278. PubMed PMID: 18846234; PubMed Central PMCID: PMC2565698.
69. National Center for Parasitology EaMC. Summarized guidelines for deworming target risk groups in Cambodia. Ministry of Health. Phnom Pehn, Cambodia 2014. p. 46 pp.
70. Sinuon M, Tsuyuoka R, Socheat D, Odermatt P, Ohmae H, Matsuda H, et al. Control of *Schistosoma mekongi* in Cambodia: results of eight years of control activities in the two endemic provinces. *Trans R Soc Trop Med Hyg*. 2007;101(1):34-9. doi: 10.1016/j.trstmh.2006.04.011. PubMed PMID: 17028047.
71. Cambodia, Cook Islands, Niue and Vanuatu eliminate lymphatic filariasis as a public health problem [Internet]. 2016. Available from: <http://www.wpro.who.int/mediacentre/releases/2016/20161010a/en/>

## Supporting information captions

- Table S1:** Results of the bivariate non-spatial regression for individual-level risk factors
- Figure S1:** Environmental predictors
- Appendix S1:** Bayesian model formulation
- STROBE** Strobe statement – checklist of items that should be included in reports of cross-sectional studies

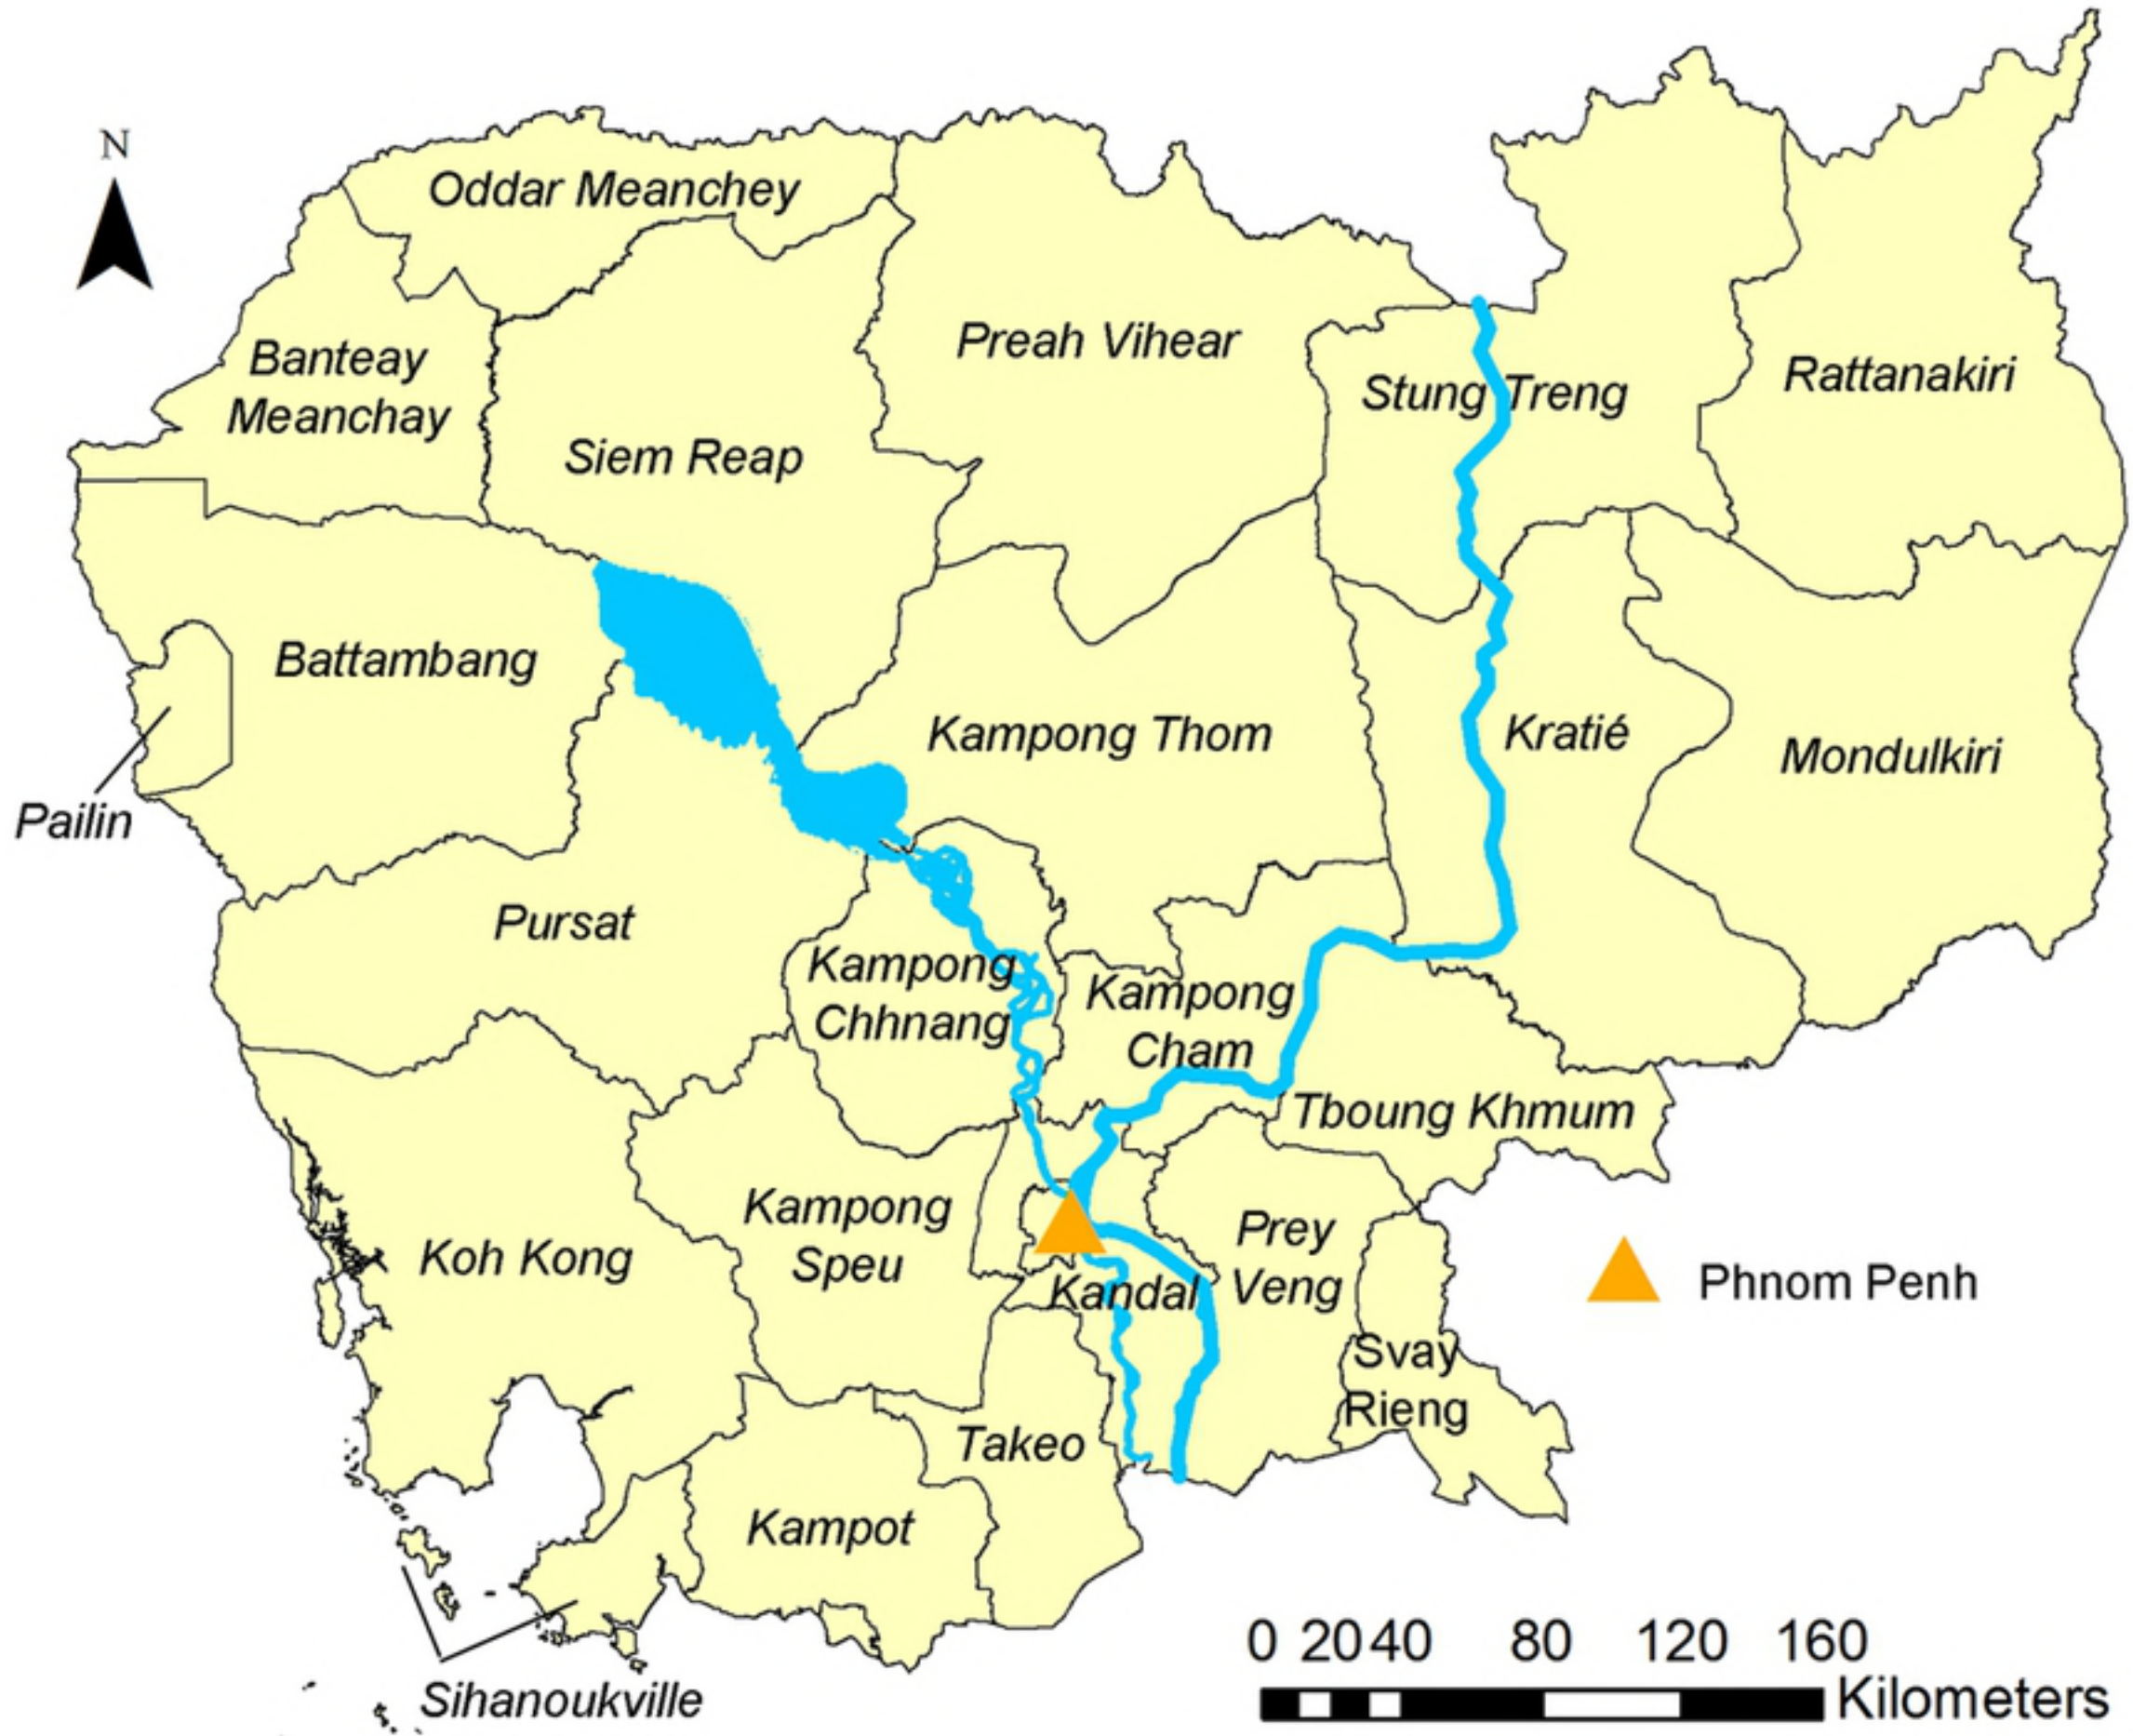

Figure 1

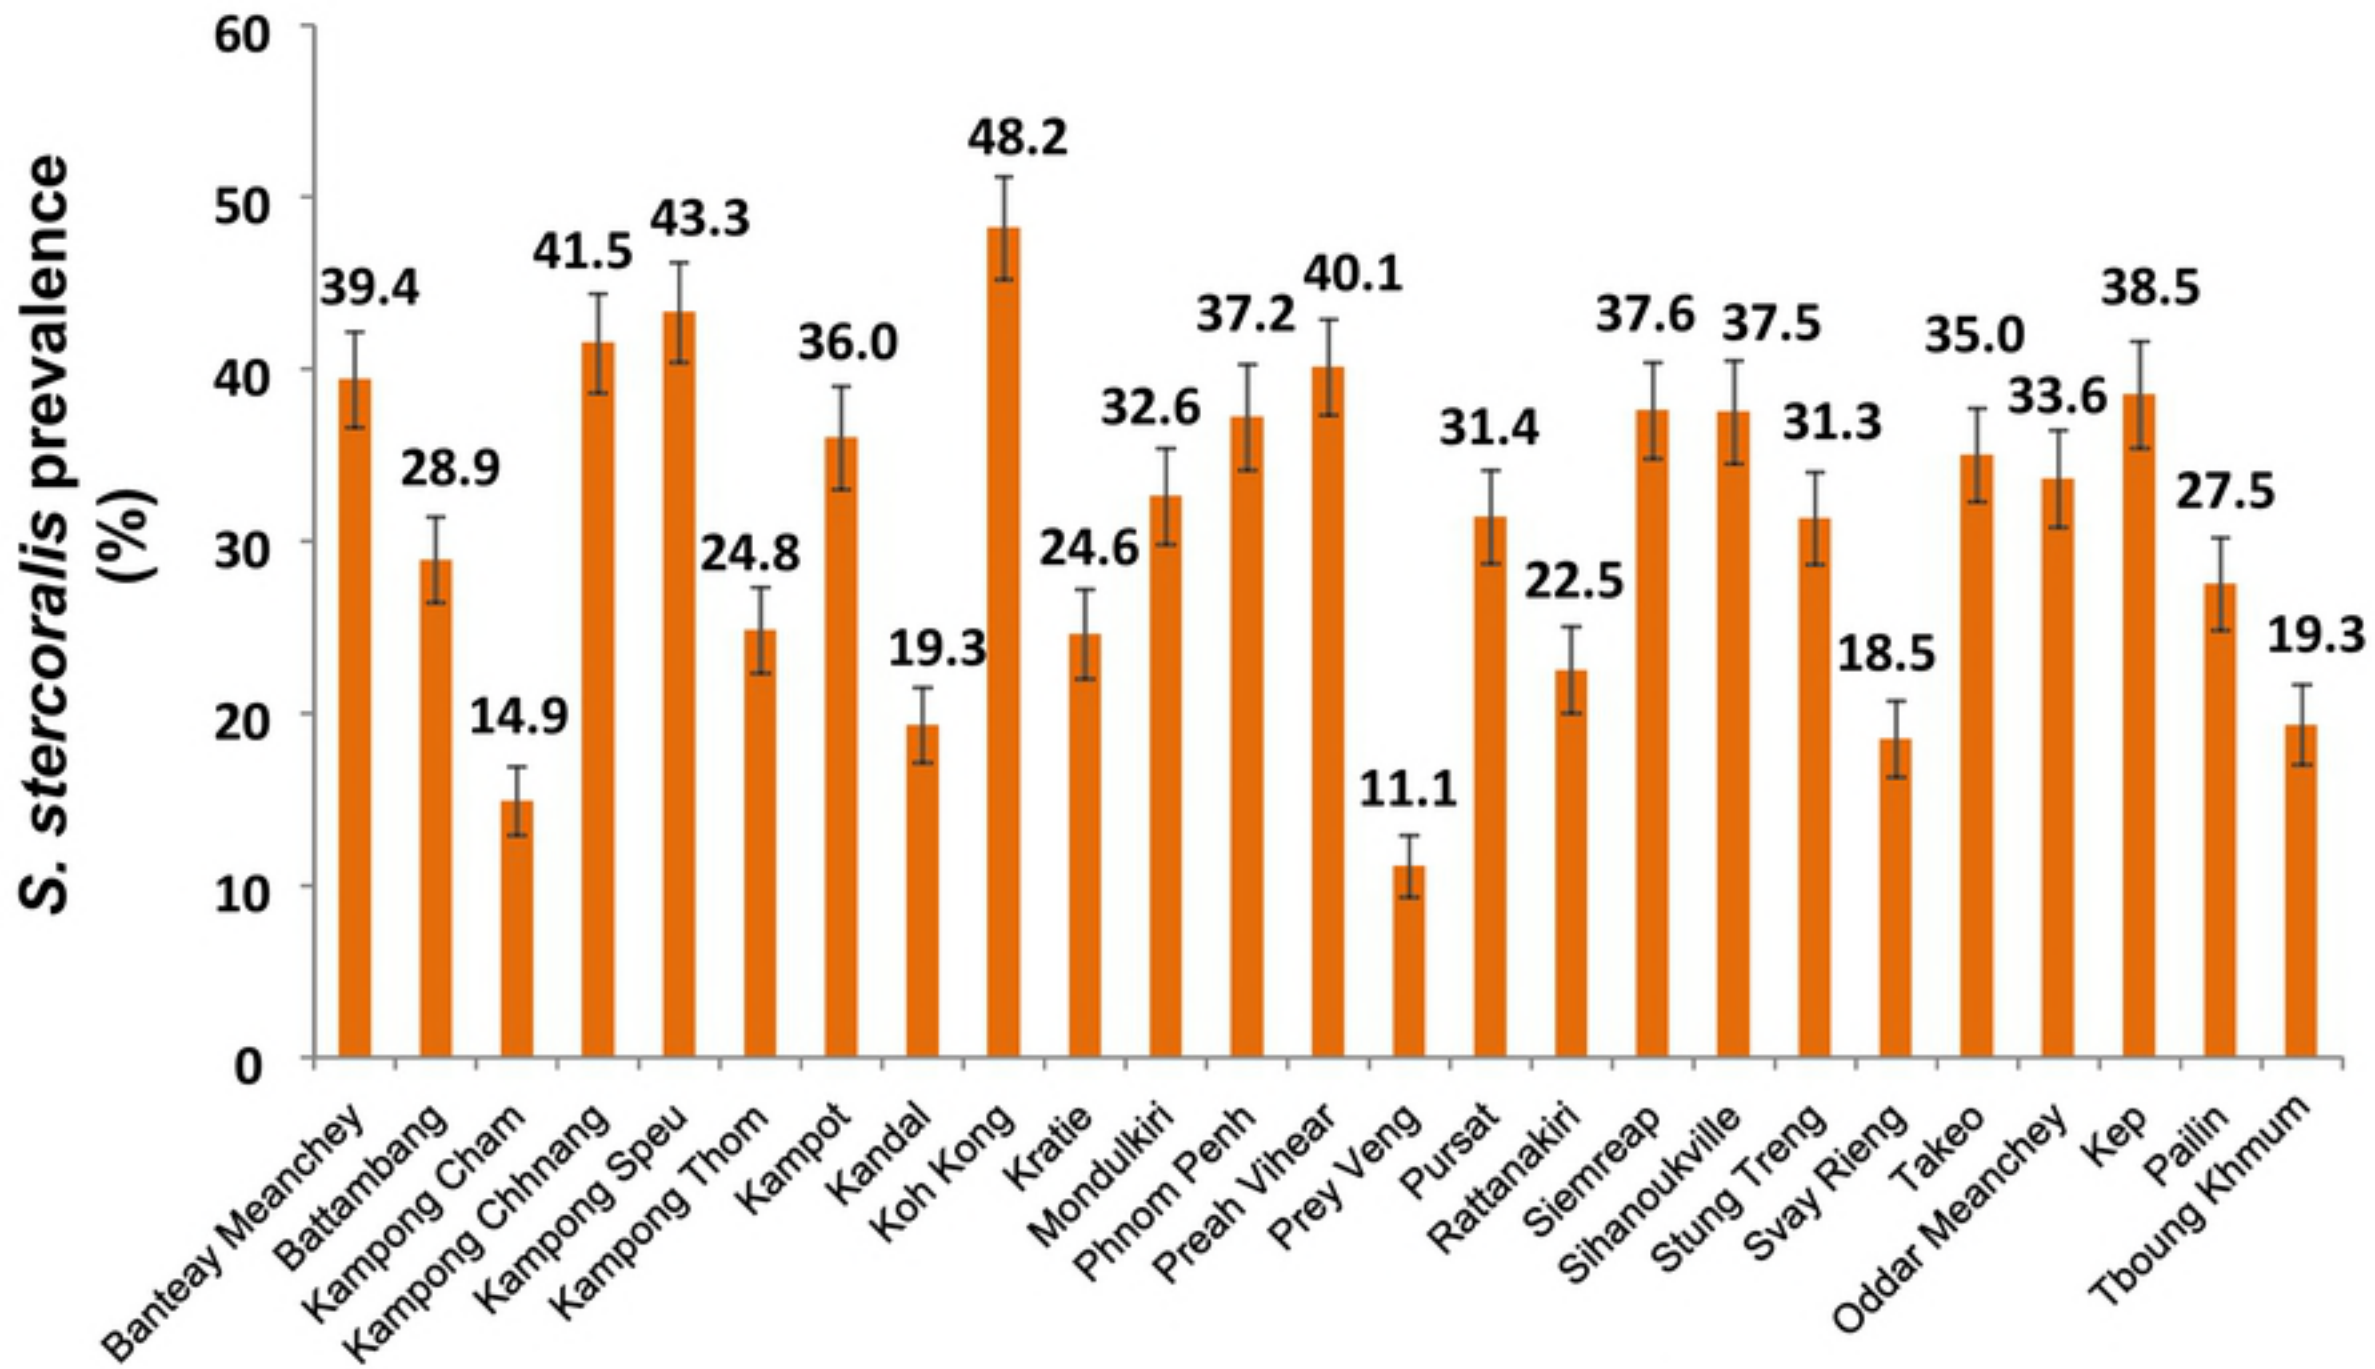

Figure 2



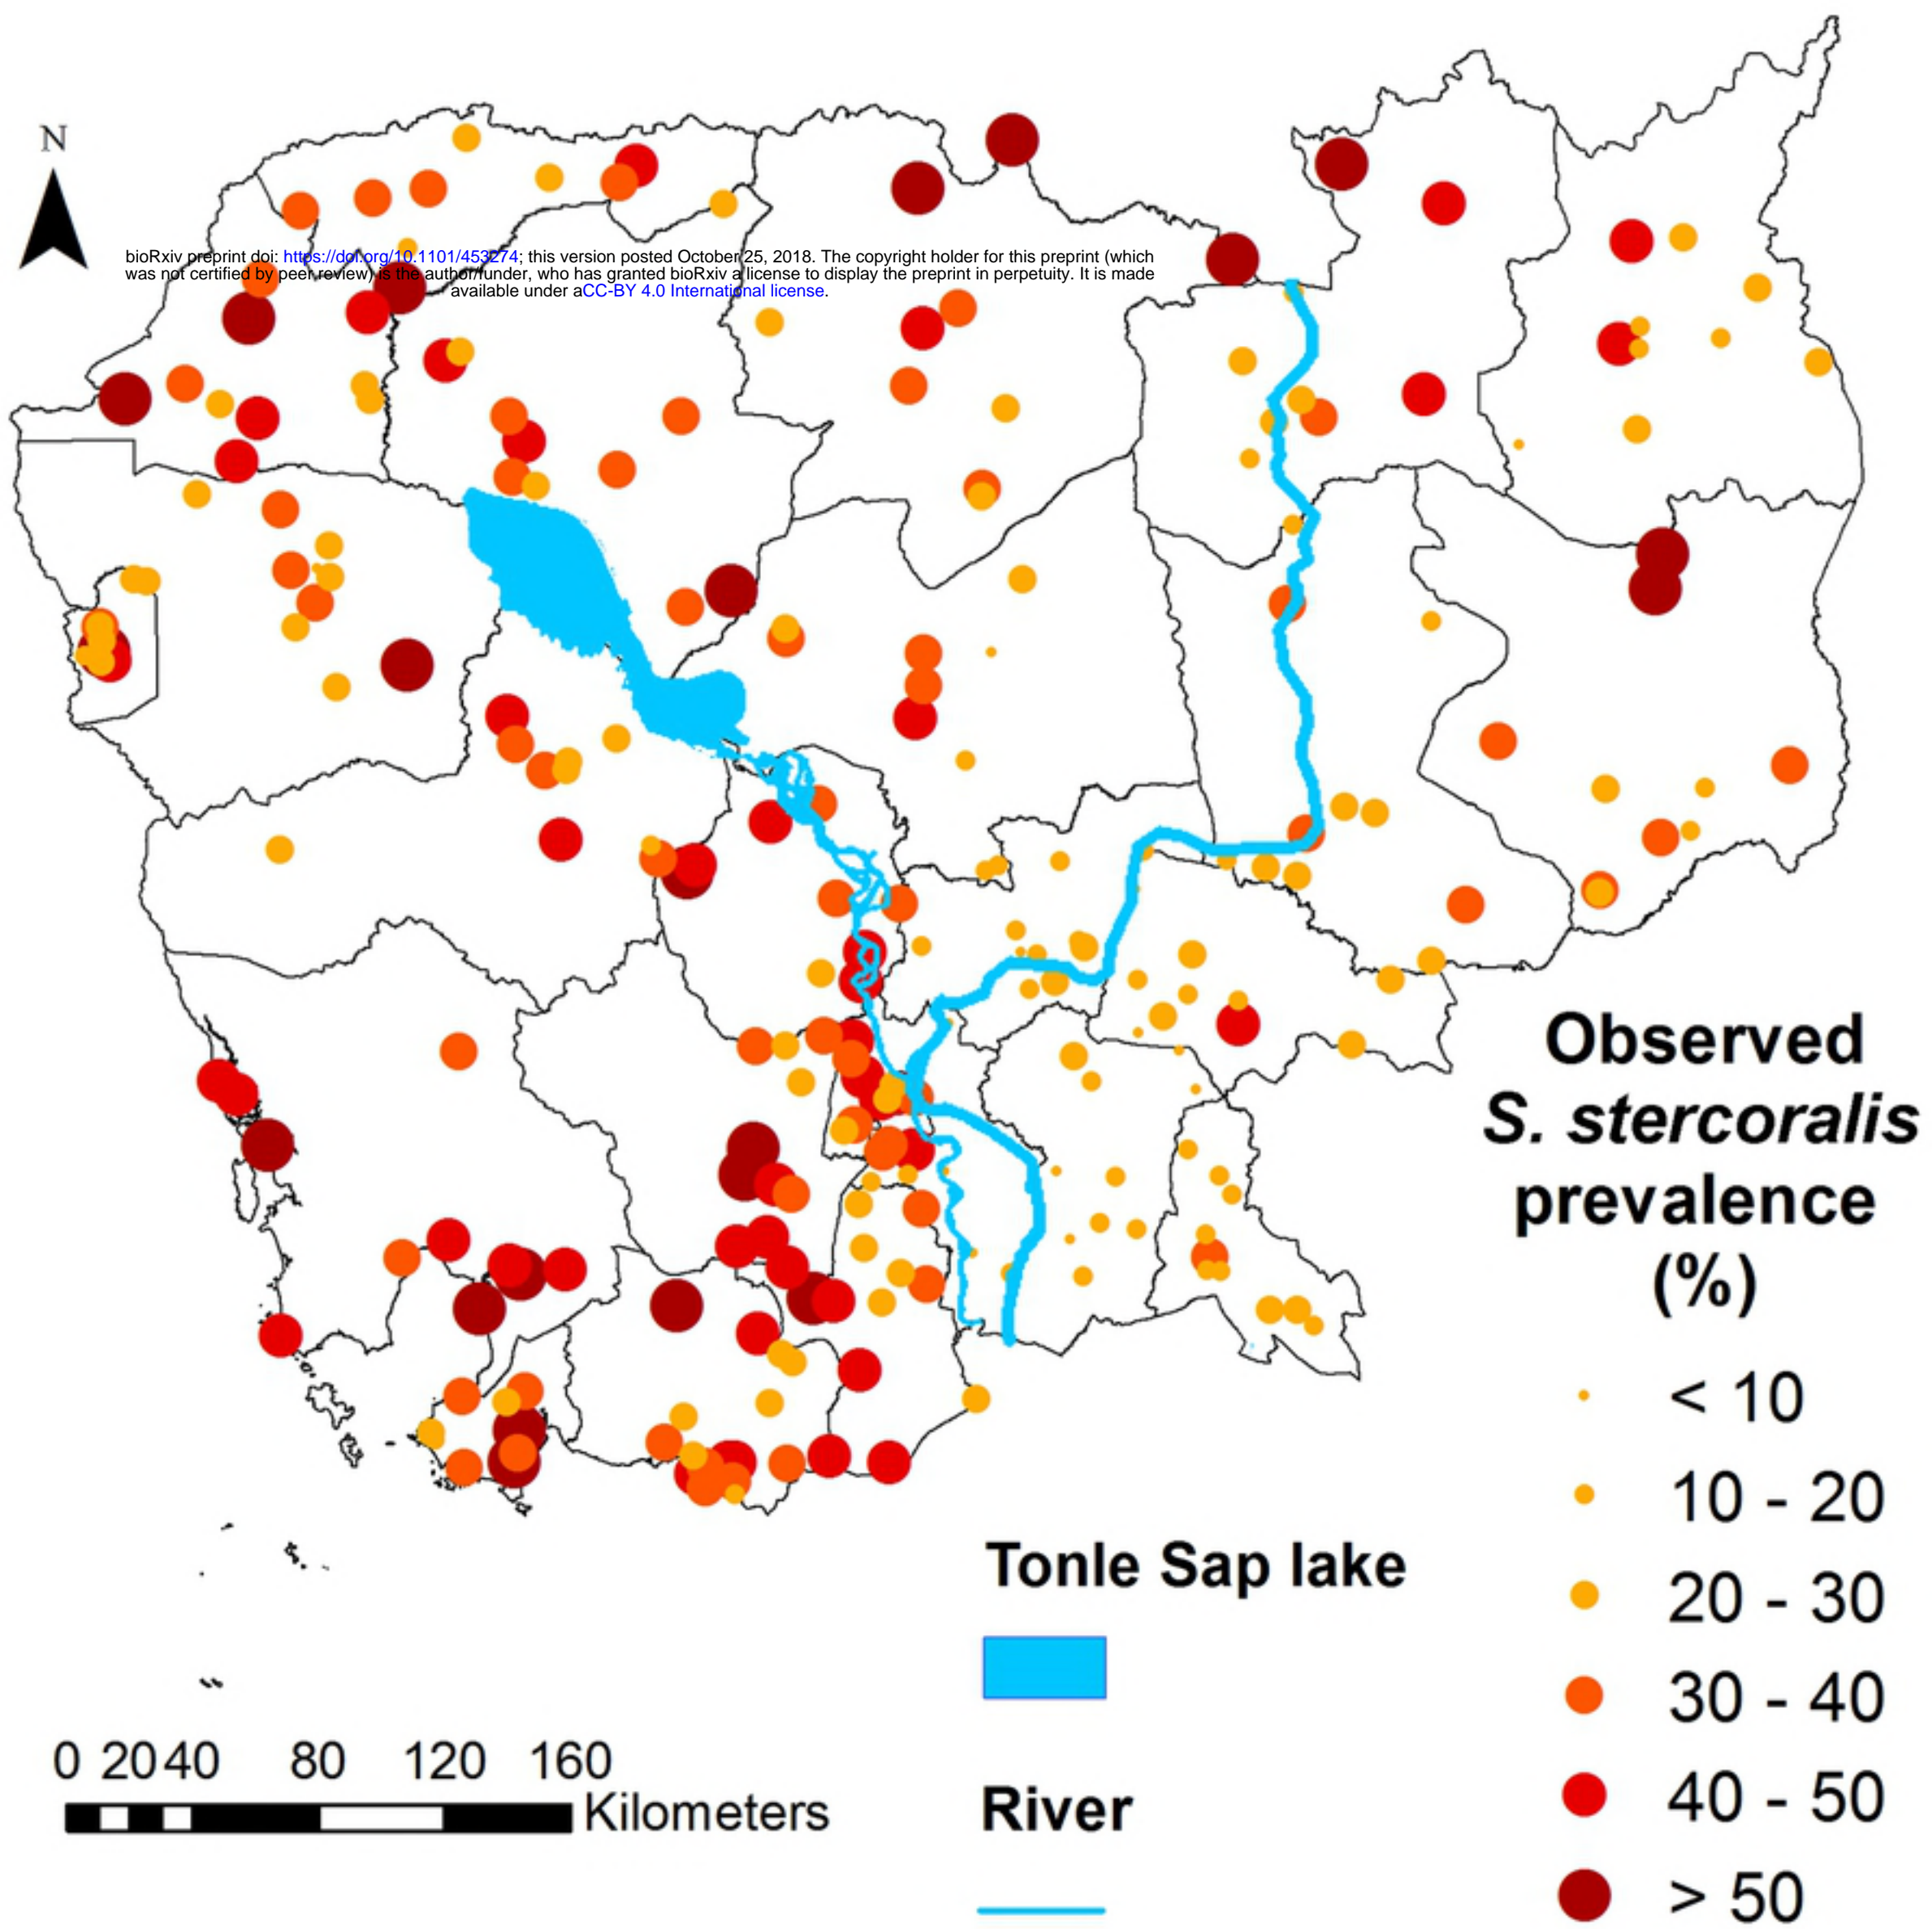

Figure 3

**A**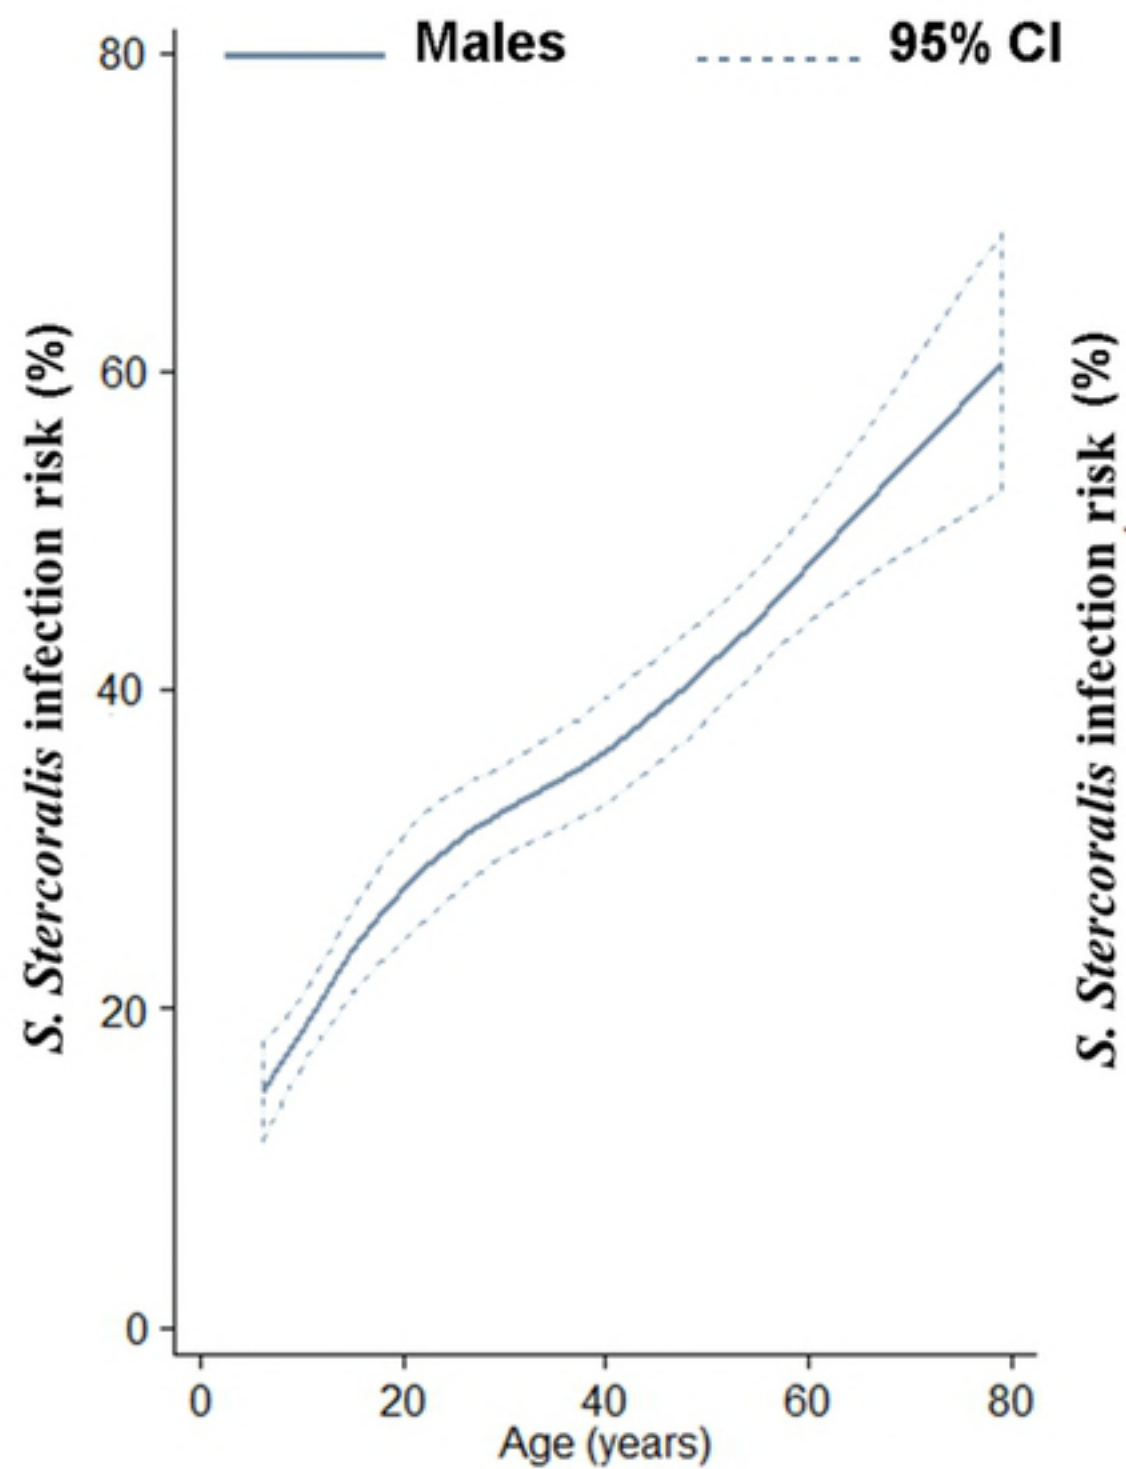**B**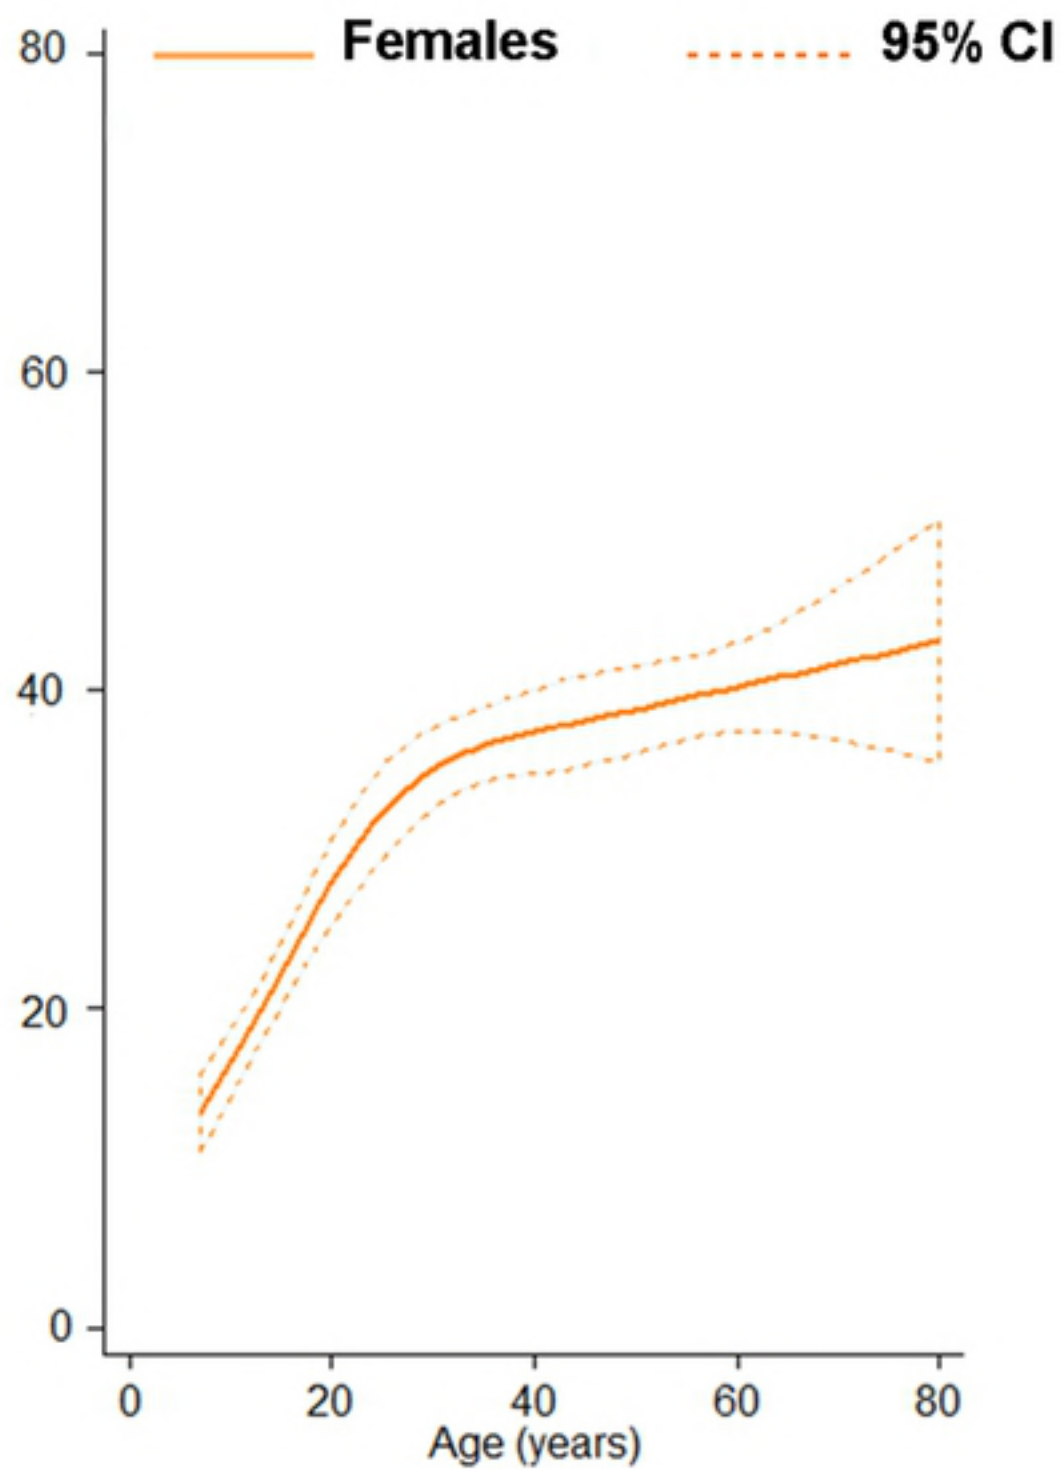

Figure 4

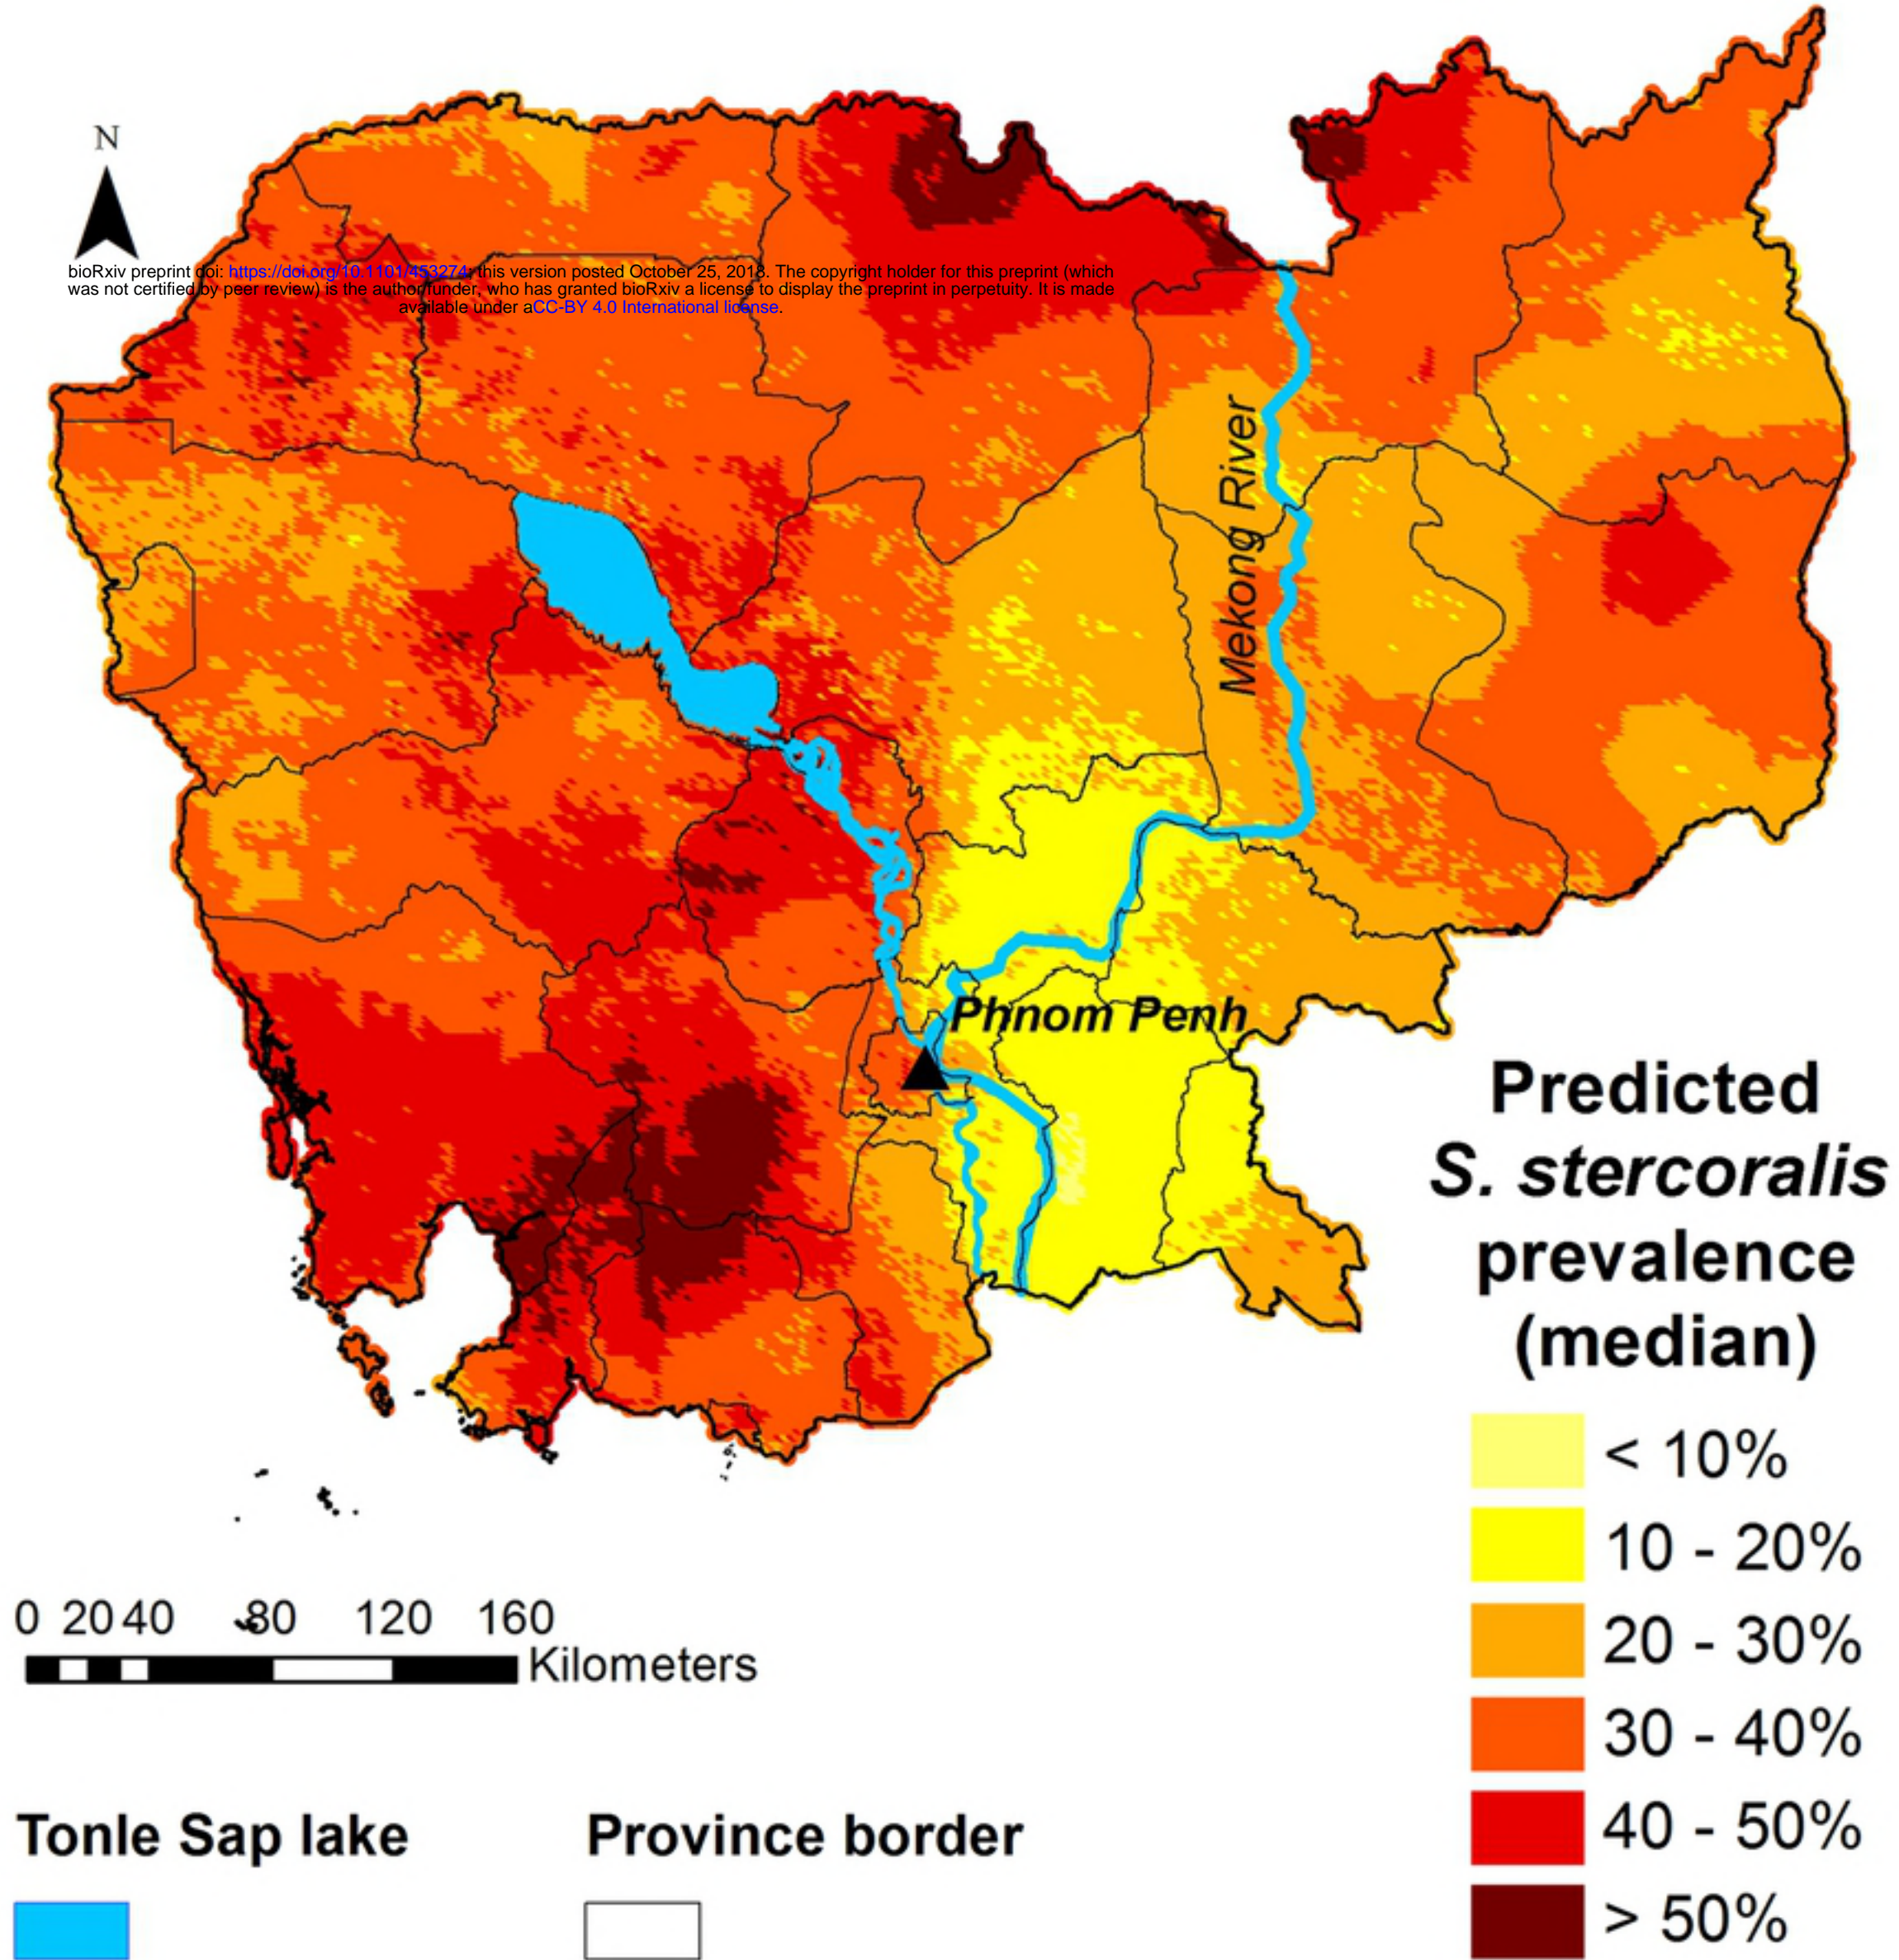

Figure 5
